# Supplementary material
Source: publisher site journal article supplement (https://www.dovepress.com/article/541797)
Supplement: Supplementary file 1 [file 541797%20Revised%20Supplementary%20Material%20PF.docx]

**Supplementary Material**

**Is sham acupuncture equally effective for primary insomnia?**

**A Bayesian network meta-analysis**

**Table S1**. PRISMA 2020 checklist

**Table S2**. Detailed search strategy in each database.

**Table S3.** Excluded studies, with reasons.

**Table S4**. Characteristics of the studies included.

**Table S5**. Details of Acupuncture Treatment Method.

**Table S6**. Sensitivity analysis for PSQI at treatment endpoint.

**Table S7**. Sensitivity analysis for PSQI at the follow-up visit.

**Table S8**. Network meta-regression beta estimates for PSQI at treatment endpoint.

**Table S9**. Network meta-regression beta estimates for PSQI at the follow-up visit.

**Table S10**. The quality of evidence for PSQI at treatment endpoint.

**Table S11**. The quality of evidence for TST at treatment endpoint.

**Table S12**. The quality of evidence for WASO at treatment endpoint.

**Table S13**. The quality of evidence for SE at treatment endpoint.

**Table S14**. The quality of evidence for PSQI at the follow-up visit.

**Figure S1**. Risk of bias summary for all included studies

**Figure S2**. Funnel plot for PSQI at treatment endpoint.

**Figure S3**. Network plot and league table for PSQI at the follow-up visit.

**Figure S4**. Funnel plot for PSQI at the follow-up visit.

**Figure S5**. SUCRA plot for PSQI at the follow-up visit.

**Figure S6**. Network plot and league table for TST at treatment endpoint.

**Figure S7**. Funnel plot for TST at treatment endpoint.

**Figure S8**. SUCRA plot for TST at treatment endpoint.

**Figure S9**. Network plot and league table for SE at treatment endpoint.

**Figure S10**. Funnel plot for SE at treatment endpoint.

**Figure S11**. SUCRA plot for SE at treatment endpoint.

**Figure S12**. Network plot and league table for WASO at treatment endpoint.

**Figure S13**. Funnel plot for WASO at treatment endpoint.

**Figure S14**. SUCRA plot for WASO at treatment endpoint.

**Table S1**. PRISMA 2020 checklist

| **Section and Topic** | **Item** | **Checklist item** | **Location where item is reported** |
| --- | --- | --- | --- |
| **TITLE** | | |  |
| Title | 1 | Identify the report as a systematic review. | P1 |
| **ABSTRACT** | | |  |
| Abstract | 2 | See the PRISMA 2020 for Abstracts checklist. | P2-3 |
| **INTRODUCTION** | | |  |
| Rationale | 3 | Describe the rationale for the review in the context of existing knowledge. | P3-5 |
| Objectives | 4 | Provide an explicit statement of the objective(s) or question(s) the review addresses. | P5-6 |
| **METHODS** | | |  |
| Eligibility criteria | 5 | Specify the inclusion and exclusion criteria for the review and how studies were grouped for the syntheses. | P7-9 |
| Information sources | 6 | Specify all databases, registers, websites, organisations, reference lists and other sources searched or consulted to identify studies. Specify the date when each source was last searched or consulted. | P6 |
| Search strategy | 7 | Present the full search strategies for all databases, registers and websites, including any filters and limits used. | P7, Table S2 |
| Selection process | 8 | Specify the methods used to decide whether a study met the inclusion criteria of the review, including how many reviewers screened each record and each report retrieved, whether they worked independently, and if applicable, details of automation tools used in the process. | P9-10 |
| Data collection process | 9 | Specify the methods used to collect data from reports, including how many reviewers collected data from each report, whether they worked independently, any processes for obtaining or confirming data from study investigators, and if applicable, details of automation tools used in the process. | P9-10 |
| Data items | 10a | List and define all outcomes for which data were sought. Specify whether all results that were compatible with each outcome domain in each study were sought (e.g. for all measures, time points, analyses), and if not, the methods used to decide which results to collect. | P9-10 |
| 10b | List and define all other variables for which data were sought (e.g. participant and intervention characteristics, funding sources). Describe any assumptions made about any missing or unclear information. | P9-10 |
| Study risk of bias assessment | 11 | Specify the methods used to assess risk of bias in the included studies, including details of the tool(s) used, how many reviewers assessed each study and whether they worked independently, and if applicable, details of automation tools used in the process. | P9 |
| Effect measures | 12 | Specify for each outcome the effect measure(s) (e.g. risk ratio, mean difference) used in the synthesis or presentation of results. | P10 |
| Synthesis methods | 13a | Describe the processes used to decide which studies were eligible for each synthesis (e.g. tabulating the study intervention characteristics and comparing against the planned groups for each synthesis (item #5)). | P7 |
| 13b | Describe any methods required to prepare the data for presentation or synthesis, such as handling of missing summary statistics, or data conversions. | P10-11 |
| 13c | Describe any methods used to tabulate or visually display results of individual studies and syntheses. | P10-11 |
| 13d | Describe any methods used to synthesize results and provide a rationale for the choice(s). If meta-analysis was performed, describe the model(s), method(s) to identify the presence and extent of statistical heterogeneity, and software package(s) used. | P10-11 |
| 13e | Describe any methods used to explore possible causes of heterogeneity among study results (e.g. subgroup analysis, meta-regression). | P11 |
| 13f | Describe any sensitivity analyses conducted to assess robustness of the synthesized results. | P11 |
| Reporting bias assessment | 14 | Describe any methods used to assess risk of bias due to missing results in a synthesis (arising from reporting biases). | P11 |
| Certainty assessment | 15 | Describe any methods used to assess certainty (or confidence) in the body of evidence for an outcome. | P12 |
| **RESULTS** | | |  |
| Study selection | 16a | Describe the results of the search and selection process, from the number of records identified in the search to the number of studies included in the review, ideally using a flow diagram. | P12, Figure 1 |
| 16b | Cite studies that might appear to meet the inclusion criteria, but which were excluded, and explain why they were excluded. | P12, Table S3 |
| Study characteristics | 17 | Cite each included study and present its characteristics. | P13, Table S4 and S5 |
| Risk of bias in studies | 18 | Present assessments of risk of bias for each included study. | P13-14, Figure 2, Figure S1 |
| Results of individual studies | 19 | For all outcomes, present, for each study: (a) summary statistics for each group (where appropriate) and (b) an effect estimate and its precision (e.g. confidence/credible interval), ideally using structured tables or plots. | P14-17, Figure 3-4, Figure S3, S5, S6, S8, S9, S11, S12, S14 |
| Results of syntheses | 20a | For each synthesis, briefly summarise the characteristics and risk of bias among contributing studies. | P13-14 |
| 20b | Present results of all statistical syntheses conducted. If meta-analysis was done, present for each the summary estimate and its precision (e.g. confidence/credible interval) and measures of statistical heterogeneity. If comparing groups, describe the direction of the effect. | P14-17, Figure 3-4, Figure S3, S5, S6, S8, S9, S11, S12, S14 |
| 20c | Present results of all investigations of possible causes of heterogeneity among study results. | P17, Table S8 and S9 |
| 20d | Present results of all sensitivity analyses conducted to assess the robustness of the synthesized results. | P14-15, Table S6 and S7 |
| Reporting biases | 21 | Present assessments of risk of bias due to missing results (arising from reporting biases) for each synthesis assessed. | P14-17, Figure S2, S4, S7, S10, S13 |
| Certainty of evidence | 22 | Present assessments of certainty (or confidence) in the body of evidence for each outcome assessed. | P17-18, Table S10-14 |
| **DISCUSSION** | | |  |
| Discussion | 23a | Provide a general interpretation of the results in the context of other evidence. | P18-25 |
| 23b | Discuss any limitations of the evidence included in the review. | P25-27 |
| 23c | Discuss any limitations of the review processes used. | P26-27 |
| 23d | Discuss implications of the results for practice, policy, and future research. | P27-28 |
| **OTHER INFORMATION** | | |  |
| Registration and protocol | 24a | Provide registration information for the review, including register name and registration number, or state that the review was not registered. | P2, P6 |
| 24b | Indicate where the review protocol can be accessed, or state that a protocol was not prepared. | P6 |
| 24c | Describe and explain any amendments to information provided at registration or in the protocol. | N/A |
| Support | 25 | Describe sources of financial or non-financial support for the review, and the role of the funders or sponsors in the review. | P29 |
| Competing interests | 26 | Declare any competing interests of review authors. | P29 |
| Availability of data, code and other materials | 27 | Report which of the following are publicly available and where they can be found: template data collection forms; data extracted from included studies; data used for all analyses; analytic code; any other materials used in the review. | P30 |

**Table S2**. Detailed search strategy in each database.

| **Pubmed** | | **Result** |
| --- | --- | --- |
| #1 | Sleep Initiation and Maintenance Disorders[Mesh] | 19671 |
| #2 | "Sleep Initiation and Maintenance Disorders"[Title/Abstract] OR "agrypnia"[Title/Abstract] OR "Awakening, Early"[Title/Abstract] OR "Chronic Insomnia"[Title/Abstract] OR "DIMS (Disorders of Initiating and Maintaining Sleep)"[Title/Abstract] OR "disorder of sleep initiation and maintenance"[Title/Abstract] OR "Disorders of Initiating and Maintaining Sleep"[Title/Abstract] OR "disorders of sleep initiation and maintenance"[Title/Abstract] OR "Dysfunction*, Sleep Initiation"[Title/Abstract] OR "Early Awakening"[Title/Abstract] OR "hyposomnia*"[Title/Abstract] OR "Insomnia Disorder*"[Title/Abstract] OR "Insomnia*"[Title/Abstract] OR "Insomnia, Chronic"[Title/Abstract] OR "Insomnia, Nonorganic"[Title/Abstract] OR "Insomnia, Primary"[Title/Abstract] OR "Insomnia, Psychophysiological"[Title/Abstract] OR "Insomnia, Rebound"[Title/Abstract] OR "Insomnia, Transient"[Title/Abstract] OR "Nonorganic Insomnia"[Title/Abstract] OR "Primary Insomnia"[Title/Abstract] OR "Psychophysiological Insomnia"[Title/Abstract] OR "Rebound Insomnia"[Title/Abstract] OR "sleep initiation and maintenance disorder*"[Title/Abstract] OR "Sleep Initiation Dysfunction*"[Title/Abstract] OR "sleep initiation/maintenance disorder"[Title/Abstract] OR "Sleeplessness"[Title/Abstract] OR "Transient Insomnia"[Title/Abstract] | 35151 |
| #3 | "Acupuncture"[Mesh] | 2103 |
| #4 | "Acupuncture"[Title/Abstract] OR "Pharmacopuncture"[Title/Abstract] OR "acupuncture therapy"[Title/Abstract] OR "shonishin"[Title/Abstract] | 30027 |
| #5 | "Randomized Controlled Trial" [Publication Type] | 629947 |
| #6 | "randomized controlled trial"[Title/Abstract] OR "controlled clinical trial"[Title/Abstract] OR "randomized"[Title/Abstract] OR "randomised"[Title/Abstract] OR "placebo"[Title/Abstract] OR "randomly"[Title/Abstract] OR "trial"[Title/Abstract] OR "groups"[Title/Abstract] NOT "animals"[Title/Abstract] | 3809444 |
| #7 | (#1 OR #2) AND (#3 OR #4) AND (#5 OR #6) | **402** |
| **Embase** | |  |
| #1 | 'insomnia'/exp OR 'insomnia' | 107199 |
| #2 | 'sleep initiation and maintenance disorders':ti,ab,kw OR 'agrypnia':ti,ab,kw OR 'awakening, early':ti,ab,kw OR 'chronic insomnia':ti,ab,kw OR 'dims (disorders of initiating and maintaining sleep)':ti,ab,kw OR 'disorder of sleep initiation and maintenance':ti,ab,kw OR 'disorders of initiating and maintaining sleep':ti,ab,kw OR 'disorders of sleep initiation and maintenance':ti,ab,kw OR 'dysfunction*, sleep initiation':ti,ab,kw OR 'early awakening':ti,ab,kw OR 'hyposomnia*':ti,ab,kw OR 'insomnia disorder*':ti,ab,kw OR 'insomnia*':ti,ab,kw OR 'insomnia, chronic':ti,ab,kw OR 'insomnia, nonorganic':ti,ab,kw OR 'insomnia, primary':ti,ab,kw OR 'insomnia, psychophysiological':ti,ab,kw OR 'insomnia, rebound':ti,ab,kw OR 'insomnia, transient':ti,ab,kw OR 'nonorganic insomnia':ti,ab,kw OR 'primary insomnia':ti,ab,kw OR 'psychophysiological insomnia':ti,ab,kw OR 'rebound insomnia':ti,ab,kw OR 'sleep initiation and maintenance disorder*':ti,ab,kw OR 'sleep initiation dysfunction*':ti,ab,kw OR 'sleep initiation maintenance disorder':ti,ab,kw OR 'sleeplessness':ti,ab,kw OR 'transient insomnia':ti,ab,kw | 58481 |
| #3 | 'acupuncture'/exp OR 'acupuncture' | 75321 |
| #4 | 'acupuncture':ti,ab,kw OR 'pharmacopuncture':ti,ab,kw OR 'acupuncture therapy':ti,ab,kw OR 'shonishin':ti,ab,kw | 42696 |
| #5 | 'randomized controlled trial'/exp OR 'randomized controlled trial' | 1162653 |
| #6 | ('randomized controlled trial':ti,ab,kw OR 'controlled clinical trial':ti,ab,kw OR 'randomized':ti,ab,kw OR 'randomised':ti,ab,kw OR 'placebo':ti,ab,kw OR 'randomly':ti,ab,kw OR 'trial':ti,ab,kw OR 'groups':ti,ab,kw) NOT 'animals':ti,ab,kw | 5351818 |
| #7 | (#1 OR #2) AND (#3 OR #4) AND (#5 OR #6) | **1044** |
| **Cochrane library** | |  |
| #1 | MeSH descriptor: [Sleep Initiation and Maintenance Disorders] explode all trees | 3911 |
| #2 | ('Sleep Initiation and Maintenance Disorders' OR 'agrypnia' OR 'Awakening, Early' OR 'Chronic Insomnia' OR 'DIMS (Disorders of Initiating and Maintaining Sleep)' OR 'disorder of sleep initiation and maintenance' OR 'Disorders of Initiating and Maintaining Sleep' OR 'disorders of sleep initiation and maintenance' OR 'Dysfunction*, Sleep Initiation' OR 'Early Awakening' OR 'hyposomnia*' OR 'Insomnia Disorder*' OR 'Insomnia*' OR 'Insomnia, Chronic' OR 'Insomnia, Nonorganic' OR 'Insomnia, Primary' OR 'Insomnia, Psychophysiological' OR 'Insomnia, Rebound' OR 'Insomnia, Transient' OR 'Nonorganic Insomnia' OR 'Primary Insomnia' OR 'Psychophysiological Insomnia' OR 'Rebound Insomnia' OR 'sleep initiation and maintenance disorder*' OR 'Sleep Initiation Dysfunction*' OR 'sleep initiation maintenance disorder' OR 'Sleeplessness' OR 'Transient Insomnia'):ti,ab,kw | 17023 |
| #3 | MeSH descriptor: [Acupuncture] explode all trees | 225 |
| #4 | ('Acupuncture' OR 'Pharmacopuncture' OR 'acupuncture therapy' OR 'shonishin'):ti,ab,kw | 21110 |
| #5 | MeSH descriptor: [Randomized Controlled Trial] explode all trees | 37 |
| #6 | ('randomized controlled trial' OR 'controlled clinical trial' OR 'randomized' OR 'randomised' OR 'placebo' OR 'randomly' OR 'trial' OR 'groups' NOT 'animals'):ti,ab,kw | 1655716 |
| #7 | (#1 OR #2) AND (#3 OR #4) AND (#5 OR #6) | **641** |
| **Web of science** | |  |
| #1 | TS=("Sleep Initiation and Maintenance Disorders" OR "agrypnia" OR "Awakening, Early" OR "Chronic Insomnia" OR "DIMS (Disorders of Initiating and Maintaining Sleep)" OR "disorder of sleep initiation and maintenance" OR "Disorders of Initiating and Maintaining Sleep" OR "disorders of sleep initiation and maintenance" OR "Dysfunction*, Sleep Initiation" OR "Early Awakening" OR "hyposomnia*" OR "Insomnia Disorder*" OR "Insomnia*" OR "Insomnia, Chronic" OR "Insomnia, Nonorganic" OR "Insomnia, Primary" OR "Insomnia, Psychophysiological" OR "Insomnia, Rebound" OR "Insomnia, Transient" OR "Nonorganic Insomnia" OR "Primary Insomnia" OR "Psychophysiological Insomnia" OR "Rebound Insomnia" OR "sleep initiation and maintenance disorder*" OR "Sleep Initiation Dysfunction*" OR "sleep initiation/maintenance disorder" OR "Sleeplessness" OR "Transient Insomnia") and Preprint Citation Index (Exclude – Database) | 88631 |
| #2 | TS=("Acupuncture" OR "Pharmacopuncture" OR "acupuncture therapy" OR "shonishin") and Preprint Citation Index (Exclude – Database) | 99200 |
| #3 | TS=("randomized controlled trial" OR "controlled clinical trial" OR "randomized" OR "randomised" OR "placebo" OR "randomly" OR "trial" OR "groups" NOT "animals") and Preprint Citation Index (Exclude – Database) | 8241053 |
| #4 | #1 AND #2 AND #3 and Preprint Citation Index (Exclude – Database) | **888** |
| **Sinomed** | |  |
| #1 | (("随机对照"[常用字段:智能] OR "随机对照试验"[常用字段:智能] OR "随机对照研究"[常用字段:智能] OR "随机对照临床研究"[常用字段:智能] OR "随机对照临床试验"[常用字段:智能] OR "随机对照试验(rct)"[常用字段:智能]) OR ("随机对照试验(主题)"[不加权:扩展])) AND (("针灸"[常用字段:智能] OR "针灸治疗"[常用字段:智能] OR "针灸疗法"[常用字段:智能] OR "常规针灸"[常用字段:智能] OR "单纯针灸"[常用字段:智能]) OR "单纯针灸治疗"[常用字段:智能] OR ("针灸疗法"[不加权:扩展])) AND (("反跳性失眠症"[常用字段:智能] OR "睡眠起始功能障碍"[常用字段:智能] OR "失眠"[常用字段:智能] OR "失眠症"[常用字段:智能] OR "慢性失眠"[常用字段:智能] OR "早醒"[常用字段:智能] OR "非器质性失眠症"[常用字段:智能] OR "原发性失眠"[常用字段:智能] OR "入睡和睡眠失调"[常用字段:智能] OR "DIMS"[常用字段:智能] OR "心理生理性失眠"[常用字段:智能] OR "暂时性失眠"[不加权:扩展])) | **3354** |
| **CNKI** | |  |
| #1 | SU=(反跳性失眠症 + 睡眠起始功能障碍 + 失眠 + 失眠症 + 慢性失眠 + 早醒 + 非器质性失眠症 + 原发性失眠 + 入睡和睡眠失调 + DIMS + 心理生理性失眠 + 暂时性失眠) AND SU=(针灸 + 针灸治疗 +针灸疗法 + 常规针灸 + 单纯针灸 + 单纯针灸治疗) AND SU=(随机对照 + 随机对照试验 + 随机对照研究 + 随机对照试验(rct) + 随机对照临床研究 + 随机对照临床试验) | **167** |
| **WanFang** | |  |
| #1 | 主题:("反跳性失眠症"OR"睡眠起始功能障碍"OR"失眠"OR"失眠症"OR"慢性失眠"OR"早醒"OR"非器质性失眠症"OR"原发性失眠"OR"入睡和睡眠失调"OR"DIMS"OR"心理生理性失眠"OR"暂时性失眠") and 主题:("针灸"OR"针灸治疗 +针灸疗法"OR"常规针灸"OR"单纯针灸"OR"单纯针灸治疗") and 主题:("随机对照"OR"随机对照试验"OR"随机对照研究"OR"随机对照试验(rct)"OR"随机对照临床研究"OR"随机对照临床试验") | **290** |

Search date: December 26, 2024.

Update date: April 23, 2025.

To avoid overlooking relevant literature, we checked the reference lists of systematic reviews published in the last two years and performed manual searches to identify additional relevant studies.

**Table S3.** Excluded studies, with reasons.

| **ID** | **Title of the excluded study** | **Summary reasons** | **Specific reasons** |
| --- | --- | --- | --- |
| 11 | Chung, K.F., et al., Acupuncture with or without combined auricular acupuncture for insomnia: a randomised, waitlist-controlled trial. Acupuncture in medicine : journal of the British Medical Acupuncture Society, 2018. 36(1): p. 2-13. | Wrong intervention | Continuous use of hypnotic drugs during the study |
| 22 | Yeung, W.F., et al., Electroacupuncture for tapering off long-term benzodiazepine use: A randomized controlled trial. Journal of Psychiatric Research, 2019. 109: p. 59-67. | Wrong intervention | Continuous use of hypnotic drugs during the study |
| 33 | Lu, Y., et al., Acupuncture Treatment for Insomnia and its Effect on Serum TNF-α, IL-6, and IL-1β levels. Acupuncture and Electro-Therapeutics Research, 2022. 47(2): p. 183-194. | Wrong intervention | Continuous use of hypnotic drugs during the study |
| 44 | Wang, C., et al., Impact of Acupuncture on Sleep and Comorbid Symptoms for Chronic Insomnia: A Randomized Clinical Trial. Nat Sci Sleep, 2021. 13: p. 1807-1822. | Wrong intervention | Continuous use of hypnotic drugs during the study |
| 55 | Guo, J., et al., Efficacy of acupuncture for primary insomnia: a randomized controlled clinical trial. Evid Based Complement Alternat Med, 2013. 2013: p. 163850. | Wrong intervention | Continuous use of hypnotic drugs during the study |
| 66 | Saletu-Zyhlarz, G.M., et al., Acute and chronic effects of electroacupuncture in primary insomnia: placebo-controlled clinical, polysomnographic, EEG topographic/tomographic and psychometric studies. Clinical EEG and neuroscience, 2020. 51(3): p. NP21‐NP22. | Wrong study design | Non-randomized controlled trial |
| 77 | Lee, S.I., et al., Analysis of Quantitative Electroencephalography (QEEG) Following Acupuncture Treatment in Patients with Insomnia: Z Scored Absolute Power and sLORETA. The Korean Society of Oriental Neuropsychiatry, 2016. 27(3): p. 169-184 | Wrong study design | Non-randomized controlled trial |
| 88 | Quan, Z., et al., Cerebral fMRI in observation on the therapeutic mechanism of electro-acupuncture on Shenmen and Sanyinjiao for insomnia. Chinese Jorunal of Interventional Imaging and Therapy, 2011. 8(3): p. 204-207 | Wrong study design | Non-randomized controlled trial |
| 99 | Chang, J.S., H.P. Liu, and W.Y. Lin, Acupuncture at SP6 Point in Lower Extremities Improved Patients' Insomnia, Which Was Also Shown Through Ryodoraku Electrical Measurements. Acupunct Electrother Res, 2016. 41(2): p. 79-93. | Lack of data | No assessment of subjective sleep quality or objective sleep parameters |
| 1010 | Minghui, G., et al., The effect of regulating and tranquilising acupuncture on the quality of life of patients with primary insomnia. Journal of Sichuan of Traditional Chinese Medicine, 2016(5) | Lack of data | No assessment of subjective sleep quality or objective sleep parameters |

**Table S4**. Characteristics of the studies included.

| **Author** | **Country** | **Year** | **Sample size** | **Age**  **(Year)** | **Woman/Man** | **Insomnia duration (Year)** | **Diagnostic system** | **Intervention** | **Treatment duration** | **Time points included in the analysis** | **Outcomes of interest** |
| --- | --- | --- | --- | --- | --- | --- | --- | --- | --- | --- | --- |
| Xi 11 | China | 2020 | EG:29  CG: 30 | EG:  43.2±13.2  CG:  42±13.8 | EG: 18/11  CG: 17/13 | EG:  3.52±3.41  CG:  3.72±3.25 | ICSD-3 | EG: AT  (Electroacupuncture)  CG: SA  (Superficial needling) | 4 wks | 4 wks | PSQI |
| Yeung 12 | China | 2009 | EG: 30  CG: 30 | EG:  48.3±9.5  CG:  47.8±8.6 | EG: 22/8  CG: 24/6 | EG:  7.7±8.1  CG:  10.8±16.7 | DSM-IV | EG: AT  (Electroacupuncture)  CG: NISA  (Streitberger sham device) | 3 wks | 4 wks | PSQI  TST  (min)  WASO (min)  SE (%) |
| Bo 13 | China | 2018 | EG: 36  CG: 36 | EG:  45±18  CG:  44±21 | EG: 12/24  CG: 25/11 | EG:  1.6±1.4  CG:  1.7±1.3 | China Insomnia Diagnosis and Treatment Guidelines for Adults 2012 | EG: AT  (Manual Acupuncture)  CG: NISA  (Unidentified sham device) | 4 wks | 4 wks  8 wks  (4-week follow-up) | PSQI |
| Yin 14 | China | 2017 | EG: 36  CG: 36 | EG:  39.7±12.9  CG:  37.3±15.1 | EG: 19/17  CG: 21/15 | NR | DSM-IV | EG: AT  (Manual Acupuncture)  CG: NISA  (Unidentified sham device) | 4 wks | 4 wks  8 wks  (4-week follow-up) | TST  (min)  SE  (%) |
| Ma 15 | China | 2022 | EG: 11  CG: 16 | EG:  57.18±10.34  CG:  57.50±4.60 | EG: 8/3  CG: 12/4 | EG:  14.3±15.9  CG:  9.1±8.8 | ICSD-3 | EG: AT  (Manual Acupuncture)  CG: SA  (Superficial needling) | 6 wks | 6 wks | PSQI  TST  (min) |
| Lai 16 | China | 2024 | EG: 36  CG: 36 | EG:  39.42±2.53  CG:  40.06±2.14 | EG: 17/19  CG: 16/20 | NR | NR | EG: AT  (Manual Acupuncture)  CG: SA  (Superficial needling) | 6 wks | 6 wks | PSQI |
| Zhang 17 | China | 2019 | EG: 32  CG: 32 | EG:  39.0±1.7  CG:  41.0±13.5 | EG: 25/7  CG: 20/12 | EG:  1.56±0.51  CG:  1.73±0.43 | ICSD-3 | EG: AT  (Manual Acupuncture)  CG: SA  (Superficial needling) | 4 wks | 4 wks | PSQI |
| Zhao 18 | China | 2019 | EG: 32  CG: 32 | EG:  36.94±10.22  CG:  39.31±10.88 | EG: 19/13  CG: 17/15 | EG:  0.39±0.11  CG:  0.33±0.13 | ICSD-3 | EG: AT  (Manual Acupuncture)  CG: NISA  (Streitberger sham device) | 8 wks | 8 wks | PSQI |
| Lee 19 | Korea | 2020 | EG: 49  CG1: 52  CG2: 49 | EG:  51.78±8.86  CG1:  52±8.91  CG2:  52±8.77 | EG: 40/9  CG1: 43/9  CG2: 30/19 | EG:  6.36±6.62  CG1:  6.03±5.61  CG2:  6.85±7.65 | DSM-V | EG: AT  (Electroacupuncture)  CG1: NISA  (Park sham device)  CG2: NAT | 4 wks | 4 wks  8 wks  (4-week follow-up) | PSQI |
| Li 20 | China | 2017 | EG: 30  CG: 27 | EG:  47±0.50  CG:  48±1 | EG: 27/3  CG: 21/6 | EG:  8.81±7.94  CG:  8.75±7.17 | DSM-IV | EG: AT  (Manual Acupuncture)  CG: SA  (Superficial needling) | 4 wks | 4 wks  8 wks  (4-week follow-up) | PSQI |
| Zhang 21 | China | 2020 | EG: 48  CG: 48 | EG:  36.6±14.4  CG:  39.2±13.8 | EG: 26/22  CG: 27/21 | EG:  1.72±1.58  CG:  1.8±1.41 | DSM-IV | EG: AT  (Manual Acupuncture)  CG: NISA  (Park sham device) | 2 wks | 2 wks  6 wks  (4-week follow-up) | PSQI |
| Li 22 | China | 2021 | EG: 29  CG: 28 | EG:  44.4±12.6  CG:  44.5±11.1 | EG: 17/12  CG: 15/13 | EG:  4.7±4  CG:  4.8±3.6 | ICSD-3 | EG: AT (Electroacupuncture)  CG: SA  (Superficial needling) | 4 wks | 4 wks | PSQI |
| Jiang 23 | China | 2024 | EG: 30  CG: 30 | EG:  36.67±2.13  CG:  37.5±1.8 | EG: 21/9  CG: 19/11 | EG:  4.54±4.41  CG:  4.64±5.22 | DSM-V | EG: AT  (Manual Acupuncture)  CG: SA  (Superficial needling) | 4 wks | 4 wks | PSQI  TST  (min)  WASO (min)  SE  (%) |
| Wang 24 | China | 2021 | EG: 30  CG: 29 | EG:  69±4  CG:  69±5 | EG: 17/13  CG: 18/11 | EG:  1.66±0.5  CG:  1.64±0.48 | ICSD-3 | EG: AT  (Electroacupuncture)  CG: SA  (Superficial needling) | 4 wks | 4 wks | PSQI |
| Xi 25 | China | 2021 | EG: 29  CG: 29 | EG:  44±12  CG:  41±12 | EG: 17/12  CG: 16/13 | EG:  6.6±4.4  CG:  5.7±4.7 | ICSD-3 | EG: AT (Electroacupuncture)  CG: SA  (Superficial needling) | 4 wks | 4 wks | PSQI |
| Yeung 26 | China | 2021 | EG: 70  CG: 70 | EG:  42.2±12.8  CG:  42.0±13.3 | EG: 56/14  CG: 56/14 | EG:  5.0±5.8  CG:  5.5±6.4 | DSM-IV | EG: AT  (Electroacupuncture)  CG: NISA  (Streitberger sham device) | 4 wks | 5 wks  9 wks  (4-week follow-up) | TST  (min)  WASO (min)  SE  (%) |
| Zhao 27 | China | 2021 | EG: 29  CG: 27 | EG:  47.17±14.08  CG:  45.59±12.65 | EG: 16/13  CG: 17/10 | EG:  2.71±3.22  CG:  2.9±3.55 | ICSD-3 | EG: AT  (Electroacupuncture)  CG: SA  (Superficial needling) | 4 wks | 4 wks  8 wks  (4-week follow-up) | PSQI |
| Huo 28 | China | 2023 | EG: 30  CG: 30 | EG:  48±9  CG:  46±8 | EG: 16/14  CG: 14/16 | EG:  3.07±1.95  CG:  2.64±2.34 | DSM-IV | EG: AT  (Manual Acupuncture)  CG: SA  (Superficial needling) | 4 wks | 4 wks  8 wks  (4-week follow-up) | PSQI |
| Zhang 29 | China | 2023 | EG: 44  CG: 46 | EG:  38.09±13.33  CG:  39.41±13.93 | EG: 28/16  CG: 30/16 | NR | DSM-V | EG: AT  (Manual Acupuncture)  CG: NISA  (Park sham device) | 2 wks | 2 wks  6 wks  (4-week follow-up) | PSQI |
| Zhao 30 | China | 2018 | EG: 30  CG: 30 | EG:  36.8±10.7  CG:  38.4±10.8 | EG: 18/12  CG: 16/14 | EG:  0.38±0.1  CG:  0.39±0.11 | DSM-V; ICSD-3 | EG: AT  (Manual Acupuncture)  CG: NISA  (Streitberger sham device) | 8 wks | 8 wks | PSQI |
| Wu 31 | China | 2021 | EG: 34  CG: 32 | EG:  47±13.59  CG:  46.22±11.91 | EG: 19/15  CG: 21/11 | EG:  3.1±4.23  CG:  2.8±3.32 | ICSD-3 | EG: AT (Electroacupuncture)  CG: SA  (Superficial needling) | 4 wks | 4 wks  8 wks  (4-week follow-up) | PSQI |
| Jing 32 | China | 2017 | EG: 30  CG: 30 | EG:  47.75±3.71  CG:  48.31±3.14 | EG: 27/3  CG: 23/7 | EG:  0.69±0.2  CG:  0.65±0.13 | DSM-IV | EG: AT  (Manual Acupuncture)  CG: SA  (Superficial needling) | 4 wks | 4 wks  8 wks  (4-week follow-up) | PSQI |
| Zhang 33 | China | 2024 | EG: 23  CG: 22 | EG:  35.66±15.01  CG:  39±15.85 | EG: 15/8  CG: 13/0 | EG:  5.08±7.11  CG:  4.41±6.78 | DSM-V | EG: AT  (Manual Acupuncture)  CG: SA  (Superficial needling) | 4 wks | 4 wks | PSQI |
| Cui 34 | China | 2021 | EG: 20  CG: 18 | EG:  52.09±14.96  CG:  45.45±23.33 | EG: 15/5  CG: 14/4 | NR | ICSD-3 | EG: AT  (Manual Acupuncture)  CG: SA  (Superficial needling) | 2 wks | 2 wks | PSQI |
| Guo 35 | China | 2019 | EG: 60  CG: 60 | EG:  46.17±3.71  CG:  48.67±3.14 | EG: 49/11  CG: 45/15 | EG:  4.95±2.4  CG:  5.3±1.6 | DSM-V | EG: AT  (Manual Acupuncture)  CG: SA  (Superficial needling) | 4 wks | 4 wks  8 wks  (4-week follow-up) | PSQI |
| Zhang 36 | China | 2024 | EG: 51  CG: 53 | EG:  52±11.86  CG:  55.79±12.72 | EG: 40/11  CG: 43/10 | EG:  6.58±6.44  CG:  6.62±7.32 | ICSD-3 | EG: AT  (Manual Acupuncture)  CG: SA  (Superficial needling) | 4 wks | 4 wks | PSQI |
| Zhang 37 | China | 2020 | EG: 30  CG: 30 | NR | NR | NR | CCMD-3 | EG: AT  (Manual Acupuncture)  CG: NISA  (Park sham device) | 2 wks | 2 wks  6 wks  (4-week follow-up) | PSQI |
| Xu 38 | China | 2014 | EG: 32  CG: 16 | EG:  47.63±12.57  CG:  47.25±10.02 | EG: 23/9  CG: 12/4 | EG:  0.51±0.64  CG:  0.57±0.45 | CCMD-2R | EG: AT (Electroacupuncture)  CG: NAT | 6 wks | 6 wks | PSQI |
| Xu 39 | China | 2022 | EG: 29  CG: 28 | EG:  67±3  CG:  67±3 | EG: 21/8  CG: 18/10 | NR | ICSD-3 | EG: AT (Electroacupuncture)  CG: SA  (Superficial needling) | 4 wks | 4 wks | PSQI |
| Zhu 40 | China | 2024 | EG: 50  CG: 50 | EG:  44.17±3.31  CG:  46.65±3.24 | EG: 39/11  CG: 35/15 | EG:  4.55±1.84  CG:  5.07±1.17 | DSM-V | EG: AT  (Manual Acupuncture)  CG: SA  (Superficial needling) | 4 wks | 4 wks  8 wks  (4-week follow-up) | PSQI |
| Liu 41 | China | 2021 | EG: 29  CG: 27 | EG:  47.17±14.08  CG:  45.59±12.65 | EG: 16/13  CG: 17/10 | EG:  0.23±0.27  CG:  0.24±0.3 | ICSD-3 | EG: AT (Electroacupuncture)  CG: SA  (Superficial needling) | 4 wks | 4 wks | PSQI |
| Chen 42 | China | 2023 | EG: 26  CG: 24 | EG:  31.5±18  CG:  40±20 | EG: 18/8  CG: 14/10 | NR | DSM-V | EG: AT  (Manual Acupuncture)  CG: SA  (Superficial needling) | 4 wks | 4 wks | PSQI  TST  (min) |
| Wang 43 | China | 2020 | EG: 43  CG: 43 | EG:  51.45±12.1  CG:  51.1±11.6 | EG: 34/9  CG: 36/7 | NR | NR | EG: AT (Electroacupuncture)  CG: SA  (Superficial needling) | 5 wks | 5 wks | PSQI  TST  (min)  WASO (min)  SE  (%) |

EG, Experimental Group; CG, Control Group; NR, Not Reported; AT, Acupuncture Therapy; SA, Superficial Acupuncture; NISA, Non-Invasive Sham Acupuncture; NAT, Non-acupuncture Therapy; PSQI, Pittsburgh Sleep Quality Index; TST, Total Sleep Time; SOL, Sleep Onset Latency; WASO, wake after sleep onset; SE, Sleep Efficiency; DSM-V, Diagnostic and Statistical Manual of Mental Disorders (Fifth Edition); DSM-IV, Diagnostic and Statistical Manual of Mental Disorders (Fourth Edition); ICSD-3, International classification of sleep disorders (Third Edition); CCMD-3, Chinese Classification of Mental Disorders (Third Edition); CCMD-2R, Chinese Classification and Diagnostic Criteria of Mental Disorders (2nd Edition, Revised).

**Table S5**. Details of Acupuncture Treatment Method.

| **Study ID** | **Treatment points** | **Depth of**  **insertion** | **Needle stimulation** | **Needle retention time** | **Needle type** | **Number of treatment session** | **Frequency** | **Other interventions in all groups** | **Study setting** |
| --- | --- | --- | --- | --- | --- | --- | --- | --- | --- |
| Xi11 2020 | EG:  GV20, GV24, EX-HN3, HT7(bilateral), SP6(bilateral)  CG:  LI10(bilateral), ST32(bilateral), BL58(bilateral) | EG:  5-10mm  CG:  1-2mm | EG:  De qi  2Hz continuous wave electrical stimulation  CG:  Superficial needle insertion with immediate cessation  No electrical stimulation | 30 min | EG:  0.30mm × 40mm  CG:  0.30mm × 40mm | 12 | 3 times a week for 4 weeks | Sleep Health Education | Nanjing University of Chinese Medicine affiliated Hospital acupuncture rehabilitation department insomnia clinic |
| Yeung12 2009 | EG:  EX-HN3, GV20, HT7(bilateral), EX-HN1(bilateral), EX-HN22  CG:  EX-HN3, GV20, HT7(bilateral), EX-HN1(bilateral), EX-HN22 | NR | EG:  De qi  4Hz square wave electrical stimulation  CG:  Non-penetrating skin stimulation  No electrical stimulation | 30 min | EG:  0.25mm × 25mm (head acupoints)  0.20mm × 25mm (ears’ acupoints)  CG:  Streitberger sham device | 9 | 3 times a week for 3 weeks | NR | NR |
| Dong13 2018 | EG:  EX-HN3, GV20, GV14  CG:  1cm next to EX-HN3, GV20, GV14 | NR | EG:  De qi  CG:  Non-penetrating skin stimulation | 30 min | EG:  0.3mm × 40mm  CG:  0.4mm × 50mm | 12 | 3 times a week for 4 weeks | NR | Department of Acupuncture, Shanghai Hospital of Traditional Chinese Medicine |
| Yin14 2017 | EG:  GV20, GV24, EX-HN3, EX-HN22(bilateral), HT7(bilateral), SP6(bilateral)  CG:  GV20, GV24, EX-HN3, EX-HN22(bilateral), HT7(bilateral), SP6(bilateral) | EG:  16.7mm  (GV20, GV24, EX-HN3, EX-HN22, HT7)  33.3-50mm  (SP6)  CG:  0mm | EG:  De qi  CG:  Non-penetrating skin stimulation | 30 min | EG:  0.3mm × 25mm  (GV20, EX-HN3)  0.3mm × 40mm  (GV24, EX-HN22, HT7, SP6)  CG: Unidentified sham device | 12 | 3 times a week for 4 weeks | NR | Shanghai Hospital of Traditional Chinese Medicine |
| Ma15 2022 | EG:  EX-HN1, GV24, GV20  CG:  1cm next to EX-HN1, GV24, GV20 | EG:  12.5-20mm  CG:  2-5mm | EG:  De qi  CG:  Superficial needle insertion with immediate cessation | 20 min | EG:  0.3mm × 25mm  CG:  0.3mm × 25mm | 18 | 3 times a week for 6 weeks | Sleep Health Education | Department of Encephalopathy and acupuncture, Dong fang Hospital, Beijing University of Chinese Medicine |
| Lai16 2024 | EG:  SP6, PC6, EX-HN3, GB13(bilateral), GV20, GV24  CG:  1cm next to SP6, PC6, EX-HN3, GB13(bilateral), GV20, GV24 | EG:  10-20mm  CG:  1-2mm | EG:  De qi  CG:  Superficial needle insertion with immediate cessation | 30 min | EG:  0.3mm × 25mm  CG:  0.3mm × 25mm | 21 | 7 times every 2 weeks for 6 weeks | NR | Affiliated Hospital of Guilin Medical College |
| Zhang17 2019 | EG:  CV12, CV13, CV14, CV6, ST36(bilateral), PC6(bilateral), ST25(bilateral)  CG:  LI10(bilateral), TE4(bilateral), GB31(bilateral), ST32(bilateral), ST34(bilateral) | EG: NR  CG: 1-2mm | EG:  De qi  CG:  Superficial needle insertion with immediate cessation | 30 min | EG:  0.3mm × 25mm  0.3mm × 40mm  CG:  0.3mm × 25mm  0.3mm × 40mm | 12 | 3 times a week for 4 weeks | NR | Department of acupuncture and moxibustion, Beijing Hospital of Traditional Chinese Medicine, Capital Medical University |
| Zhao18 2019 | EG:  GV24, GB13, EX-HN1, GV11, HT7(bilateral)  CG:  GV24, GB13, EX-HN1, GV11, HT7(bilateral) | EG:  10-30mm  CG:  0mm | EG:  De qi  CG:  Non-penetrating skin stimulation | 30 min | EG:  0.3mm × 25mm  (GV24, GB13, EX-HN1, GV11)  CG:  Streitberger sham device | 24 | 3 times a week for 8 weeks | NR | Shanghai Municipal Hospital of TCM affiliated to Shanghai TCM University |
| Lee19 2020 | EG:  GV20, EX-HN3, HT7(bilateral), PC6(bilateral), BL63(bilateral), KI4(bilateral)  CG1:  Non-acupoints  CG2:  Usual care | EG:  5-20mm  CG1:  0mm | EG:  De qi  4Hz continuous wave electrical stimulation  CG1:  Non-penetrating skin stimulation  No electrical stimulation | 30 min | EG:  0.25mm × 40mm  CG1:  Park sham device | 10 | 2-3 times a week for 4 weeks | Sleep Hygiene Education | Daejeon Korean Medicine Hospital of Daejeon University;  Dunsan Korean Medicine Hospital of Daejeon University;  Dongeui University Korean Medical Hospital;  Semyung University Korean Medicine Hospital |
| Li20 2017 | EG:  DU20, DU24, EX-HN1, GB13, SP6(bilateral), PC6(bilateral), HT7(bilateral)  CG:  LI14, LI10, TE4, TE5, GB31, ST32, ST34 | EG: NR  CG: 1-2mm | EG:  De qi  CG:  Superficial needle insertion with immediate cessation | 30 min | NR | 12 | 3 times a week for 4 weeks | NR | Department of acupuncture and moxibustion, Beijing Hospital of Traditional Chinese Medicine, Capital Medical University |
| Zhang21 2020 | EG:  bilateral EX-HN22, PC6, HT7, LI4, ST36, KI6, HT7, LR3  CG:  bilateral EX-HN22, PC6, HT7, LI4, ST36, KI6, HT7, LR3 | EG:  10-20mm  CG:  0mm | EG:  De qi  CG:  Non-penetrating skin stimulation | 30 min | EG:  0.3mm × 25mm  0.3mm × 40mm  CG1:  Park sham device | 10 | 5 times a week for 2 weeks | NR | Department of Acupuncture and moxibustion, Sichuan Hospital of Traditional Chinese Medicine |
| Li22 2021 | EG:  GV20, GV24, EX-HN3, HT7(bilateral), SP6(bilateral)  CG:  bilateral LI10, ST32, BL58 | EG:  10-15mm  CG:  2-3mm | EG:  De qi  2Hz continuous wave electrical stimulation  CG:  Superficial needle insertion with immediate cessation  No electrical stimulation | 30 min | EG:  0.3mm × 40mm  CG:  0.3mm × 40mm | 12 | 3 times a week for 4 weeks | Sleep Hygiene Education | Department of acupuncture and moxibustion, Affiliated Hospital of Nanjing University of Chinese Medicine |
| Jiang23 2024 | EG:  GV20, GV24, EX-HN1, HT7(bilateral), GB13(bilateral), PC6(bilateral), SP6(bilateral)  CG:  bilateral BIAO, LI10, GB31, ST32, ST34 | EG: 3-5mm  CG: 1-2mm | EG:  De qi  CG:  Superficial needle insertion with immediate cessation | 30 min | EG:  0.25mm × 25mm  CG:  0.25mm × 25mm | 12 | 3 times a week for 4 weeks | NR | outpatient acupuncture clinics of Beijing Hospital of Traditional Chinese Medicine, Capital Medical University (Beijing TCM Hospital) |
| Wang24 2021 | EG:  GV20, EX-HN3, HT7, SP6, BL15, BL23  CG:  GV20, EX-HN3, HT7, SP6, BL15, BL23 | EG:  10-20mm  CG:  2-3mm | EG:  De qi  2Hz discontinuous wave electrical stimulation  CG:  Superficial needle insertion with immediate cessation  No electrical stimulation | 30 min | EG:  0.3mm × 40mm  CG:  0.3mm × 40mm | 12 | 3 times a week for 4 weeks | Sleep Health Education | Insomnia clinic, Affiliated Hospital of Nanjing University of Chinese Medicine |
| Xi25 2021 | EG:  GV20, GV24, EX-HN3, HT7, SP6  CG:  LI10, ST32, BL58 | EG:  5-10mm  CG:  1-2mm | EG:  De qi  2Hz continuous wave electrical stimulation  CG:  Superficial needle insertion with immediate cessation  No electrical stimulation | 30 min | EG:  0.3mm × 40mm  CG:  0.3mm × 25mm | 12 | 3 times a week for 4 weeks | Sleep Health Education | Insomnia clinic, Affiliated Hospital of Nanjing University of Chinese Medicine |
| Yeung26 2021 | EG:  TF4(bilateral), ST8(bilateral), EX-HN1(bilateral), EX-HN3, GV20,  alternative SP6, PC6, HT7, EX-HN5, GV24, EX-HN22, GB8, LR3, GB15  CG:  1cm next to TF4(bilateral), ST8(bilateral), EX-HN1(bilateral), EX-HN3, GV20 | NR | EG:  De qi  4Hz continuous wave electrical stimulation  CG:  Non-penetrating skin stimulation  No electrical stimulation | 30 min | EG:  0.25mm × 30mm  CG:  Streitberger sham device | 8 | twice a week for 4 weeks | NR | Treatment room of the  School of Nursing at the Hong Kong Polytechnic University |
| Zhao27 2021 | EG:  GV20, EX-HN3, HT7(bilateral), SP6(bilateral)  CG:  bilateral LI15, LI14, ST32, BL58 | EG:  5-10mm  (GV20, EX-HN3)  10-15mm  (HT7, SP6)  CG:  1-2mm | EG:  De qi  2Hz continuous wave electrical stimulation  CG:  Superficial needle insertion with immediate cessation  No electrical stimulation | 30 min | NR | 12 | 3 times a week for 4 weeks | NR | Jiangsu Province Hospital of Traditional Chinese Medicine insomnia clinic |
| Huo28 2023 | EG:  GV20, GV24, EX-HN1, SP6(bilateral), PC6(bilateral), HT7(bilateral), GB13(bilateral)  CG:  Non-acupoints | EG:  10-20mm  (GV20, GV24, EX-HN1, SP6)  10-30mm  (PC6, HT7, GB13)  CG:  2-3mm | EG:  De qi  CG:  Superficial needle insertion with immediate cessation | 30 min | EG:  0.25mm × 40mm  CG:  0.25mm × 25mm | 12 | 3 times a week for 4 weeks | NR | Insomnia clinic, Acupuncture Center, Beijing Hospital of Traditional Chinese Medicine, Capital Medical University |
| Zhang29 2023 | EG:  bilateral EX-HN22, PC6, HT7, LI4, ST36, KI6, BL62, LR3  CG:  bilateral EX-HN22, PC6, HT7, LI4, ST36, KI6, BL62, LR3 | EG:  5-8mm  (EX-HN22, PC6, LI4)  3-5mm  (HT7, LR3)  2-5mm  (KI6, BL62)  10-13mm (ST36)  CG:  0mm | EG:  De qi  CG:  Non-penetrating skin stimulation | 30 min | EG:  0.3mm × 25mm  0.3mm × 40mm  CG:  Park sham device | 10 | 5 times a week for 2 weeks | NR | Department of Acupuncture and moxibustion, Sichuan Hospital of Traditional Chinese Medicine |
| Zhao30 2018 | EG:  EX-HN1, GV24, GV20, GB13, KI3, HT7  CG:  EX-HN1, GV24, GV20, GB13, KI3, HT7 | EG:  10-30mm  CG:  0mm | EG:  De qi  CG:  Non-penetrating skin stimulation | 30 min | EG:  0.25mm × 25mm  CG:  Streitberger sham device | 24 | 3 times a week for 8 weeks | NR | Shanghai Hospital of Traditional Chinese Medicine affiliated to Shanghai University of Traditional Chinese Medicine |
| Wu31 2021 | EG:  GV20, EX-HN3, HT7, SP6, BL13, BL15, BL18, BL20, BL23  CG:  Non-acupoints | EG:  5-10mm  (GV20, EX-HN3)  10-15mm  (BL13, BL15, BL18, BL20, BL23)  15mm  (HT7, SP6)  CG:  1-2mm | EG:  De qi  2Hz discontinuous wave electrical stimulation  CG:  Superficial needle insertion with immediate cessation  No electrical stimulation | 30 min | NR | 12 | 3 times a week for 4 weeks | Sleep Hygiene Education | Outpatient Department of Acupuncture Rehabilitation, Affiliated Hospital of Nanjing University of Chinese Medicine |
| Guo32 2017 | EG:  GV20, GV24, EX-HN1, GB13, HT7(bilateral), PC6(bilateral), SP6(bilateral)  CG:  LI14, LI10, TE4, TE5, GB31, ST32, ST34 | EG: NR  CG: 1-2mm | EG:  De qi  CG:  Superficial needle insertion with immediate cessation | 30 min | EG:  0.32mm × 40mm  CG:  0.32mm × 40mm | 12 | 3 times a week for 4 weeks | NR | Beijing Hospital of Traditional Chinese Medicine, Capital Medical University |
| Song33 2024 | EG:  GV20, GV24, GB13, EX-HN1, SP6, PC6, HT7  CG:  2cm next to LI14, LI10, TE4, TE5, GB31, ST32, ST34 | EG: NR  CG: 1-2mm | EG:  De qi  CG:  Superficial needle insertion with immediate cessation | 30 min | EG:  0.3mm × 25mm  (GV20, GV24, GB13, EX-HN1)  0.3mm × 40mm  (SP6, PC6, HT7)  CG:  0.3mm × 25mm  (GV20, GV24, GB13, EX-HN1)  0.3mm × 40mm  (SP6, PC6, HT7) | 12 | 3 times a week for 4 weeks | NR | Beijing Hospital of Traditional Chinese Medicine affiliated to Capital Medical University acupuncture insomnia specialist outpatient |
| Cui34 2021 | EG:  GV20, GV24, EX-HN1, GB13, HT7(bilateral), PC6(bilateral), SP6(bilateral)  CG:  2cm next to GV20, GV24, EX-HN1, GB13, HT7(bilateral), PC6(bilateral), SP6(bilateral) | EG: NR  CG: 1-2mm | EG:  De qi  CG:  Superficial needle insertion with immediate cessation | 30 min | NR | 6 | 3 times a week for 2 weeks | NR | Beijing Hospital of Traditional Chinese Medicine, Capital Medical University |
| Guo35 2019 | EG:  GV20, GV24, GB13, EX-HN1, SP6, PC6, HT7  CG:  LI14, LI10, TE4, TE5, GB31, ST32, ST34 | EG: NR  CG: 1-2mm | EG:  De qi  CG:  Superficial needle insertion with immediate cessation | 30 min | EG:  0.3mm × 25mm  (GV20, GV24, GB13, EX-HN1)  0.3mm × 40mm  (SP6, PC6, HT7)  CG:  0.3mm × 25mm  (GV20, GV24, GB13, EX-HN1)  0.3mm × 40mm  (SP6, PC6, HT7) | 12 | 3 times a week for 4 weeks | NR | Insomnia clinic, Acupuncture Center, Beijing Hospital of Traditional Chinese Medicine, Capital Medical University |
| Zhang36 2024 | EG:  GV20, bilateral BL15, BL20, HT7, KI6, BL62, EX-HN22, SP6, ST36  CG:  1cm next to GV20, bilateral BL15, BL20, HT7, KI6, BL62, EX-HN22, SP6, ST36 | EG:  5mm(GV20)  10mm  (BL15, BL20)  20mm  (HT7, KI6, BL62, EX-HN22, SP6, ST36)  CG: 1mm | EG:  De qi  CG:  Superficial needle insertion with immediate cessation | 30 min | EG:  0.32mm × 25mm  CG:  0.32mm × 25mm | 14 | Every other day for 4 weeks | NR | Beijing Hospital of Traditional Chinese Medicine, Capital Medical University |
| Leixiao Zhang37 2020 | EG:  HT7, EX-HN22, KI6, BL62, PC6, LI4, LR3  CG:  HT7, EX-HN22, KI6, BL62, PC6, LI4, LR3 | EG: NR  CG: 0mm | EG:  De qi  CG:  Non-penetrating skin stimulation | 30 min | EG:  NR  CG:  Park sham device | 10 | 5 times a week for 2 weeks | NR | Outpatient Department of acupuncture and moxibustion, the Third Affiliated Hospital of Chengdu University of Chinese Medicine |
| Xu38,39 2014 | EG:  GV20, GV24, SP6, HT7, EX-HN22, KI3, ST36, LR3  CG:  Waiting list | EG:  20mm  (GV20, GV24, EX-HN22) | EG:  De qi  2Hz discontinuous wave electrical stimulation | 30 min | EG:  0.3mm × 25mm  (GV20, GV24, EX-HN22)  0.3mm × 40mm  (SP6, HT7, KI3, ST36, LR3) | 18 | 3 times a week for 6 weeks | Sleep Hygiene Education | Shanghai Hospital of Traditional Chinese Medicine acupuncture outpatient department |
| Xu 2022 | EG:  GV20, GV24, EX-HN3, HT7, SP6  CG:  GV20, GV24, EX-HN3, HT7, SP6 | EG:  10-20mm  CG:  2-3mm | EG:  De qi  2Hz discontinuous wave electrical stimulation(GV20, EX-HN3)  CG:  Superficial needle insertion with immediate cessation  No electrical stimulation | 30 min | EG:  0.3mm × 40mm  CG:  0.3mm × 40mm | 12 | 3 times a week for 4 weeks | Sleep Health Education | Nanjing University of Traditional Chinese Medicine Affiliated Hospital and Yueyahu Community Health Service Center insomnia clinic |
| Zhu40 2024 | EG:  GV20, GV24, GB13, EX-HN1, SP6, PC6, HT7  CG:  LI14, LI10, TE4, TE5, GB31, ST32, ST34 | EG:  25mm(SP6)  10mm  (HT7, PC6)  NR  (GV20, GV24, GB13, EX-HN1)  CG:  1-2mm | EG:  De qi  CG:  Superficial needle insertion with immediate cessation | 30 min | EG:  0.3mm × 40mm  (SP6, HT7, PC6)  0.3mm × 25mm  (GV20, GV24, GB13, EX-HN1)  CG:  0.3mm × 40mm  0.3mm × 25mm | 12 | 3 times a week for 4 weeks | Sleep Hygiene Education | Insomnia clinic, Department of acupuncture and moxibustion, Beijing Hospital of Traditional Chinese Medicine, Capital Medical University |
| Liu41 2021 | EG:  GV20, GV29, HT7(bilateral), SP6(bilateral)  CG:  LI15(bilateral), LI14(bilateral), ST32(bilateral) | EG:  10mm  (GV20, GV29, HT7)  15mm(SP6)  CG:  1-2mm | EG:  De qi  2Hz dilatational  wave electrical stimulation  CG:  Superficial needle insertion with immediate cessation  No electrical stimulation | 30 min | EG:  0.3mm × 25mm  CG:  0.3mm × 25mm | 12 | 3 times a week for 4 weeks | NR | Department of Acupuncture and Moxibustion, Department of Neurology, Affiliated Hospital of Nanjing University of Chinese Medicine |
| Chen42 2023 | EG:  GV20, GV24, EX-HN1, GB13, HT7(bilateral), PC6(bilateral), SP6(bilateral)  CG:  bilateral LI14, LI10, TE4, TE5, GB31, ST34, ST32 | EG:  10mm  (GV20, GV29, EX-HN1, GB13, SP6)  5mm  (HT7, PC6)  CG:NR | EG:  De qi  CG:  Superficial needle insertion with immediate cessation | 30 min | NR | 12 | 3 times a week for 4 weeks | NR | Department of Acupuncture and Moxibustion, Beijing Hospital of Traditional Chinese Medicine Affiliated to Capital Medical University |
| Wang43 2020 | EG:  GV-20, HT-7(bilateral), SP-6(bilateral)  CG:  Non-acupoints | EG:  5-8mm (GV20)  10mm  (HT-7, SP-6)  CG:NR | EG:  De qi  4Hz square wave electrical stimulation  CG:  Superficial needle insertion with immediate cessation  No electrical stimulation | 30 min | 0.35mm × 25mm | 25 | 5 times a week for 5 weeks | NR | outpatient clinics in the Neurological Department of China-Japan Union Hospital of Jilin University and Changchun University of Chinese Medicine |

EG, experimental group; CG, control group; NR, Not Reported

**Table S6**. Sensitivity analysis for PSQI at treatment endpoint.

|  | AT vs SA | AT vs SC | AT vs NISA | SA vs NAT | SA vs NISA | NAT vs NISA |
| --- | --- | --- | --- | --- | --- | --- |
| Before | **-3.66**  **(-4.48, -2.84)** | **-4.08**  **(-6.72, -1.44)** | **-4.35**  **(-5.67, -3)** | -0.42  (-3.19, 2.33) | -0.69  (-2.24, 0.89) | -0.27  (-3.01, 2.52) |
| After | **-3.58**  **(-4.54, -2.62)** | **-4.35**  **(-7.95, -0.74)** | **-4.36**  **(-5.81, -2.89)** | -0.76  (-4.5, 2.96) | -0.77  (-2.52, 0.98) | -0.01  (-3.61, 3.62) |

The results are presented as the mean difference (95% confidence interval); The values in bold text indicate statistical significance; AT, Acupuncture Therapy; SA, Superficial Acupuncture; NISA, Non-Invasive Sham Acupuncture; NAT, Non-acupuncture Therapy.

**Table S7**. Sensitivity analysis for PSQI at the follow-up visit.

|  | AT vs SA | AT vs NAT | AT vs NISA | SA vs NAT | SA vs NISA | NAT vs NISA |
| --- | --- | --- | --- | --- | --- | --- |
| Before | **-4.21**  **(-6.14, -2.3)** | **-4.96**  **(-9.46, -0.45)** | **-5.44**  **(-7.63, -3.15)** | -0.75  (-5.64, 4.14) | -1.22  (-4.13, 1.78) | -0.47  (-4.95, 4.08) |
| After | **-4.04**  **(-7.11, -0.95)** | -4.97  (-10.42, 0.48) | **-5.42**  **(-8.1, -2.66)** | -0.93  (-7.21, 5.31) | -1.38  (-5.46, 2.74) | -0.45  (-5.87, 5.04) |

The results are presented as the mean difference (95% confidence interval); The values in bold text indicate statistical significance; AT, Acupuncture Therapy; SA, Superficial Acupuncture; NISA, Non-Invasive Sham Acupuncture; NAT, Non-acupuncture Therapy.

**Table S8**. Network meta-regression beta estimates for PSQI at treatment endpoint.

| Covariate | AT vs SA | AT vs NAT | AT vs NISA | SA vs NAT | SA vs NISA | NISA vs NAT |
| --- | --- | --- | --- | --- | --- | --- |
| Year | 0.81  (-1.27, 2.89) | -0.73  (-4.93, 3.58) | -2.51  (-4.4, 0.57) | -1.7  (-6.27, 2.9) | -3.44  (-6.29, 0.54) | 1.91  (-2.52, 6.49) |
| Sample size | -0.56  (-2.23, 1.11) | -0.51  (-5.52, 4.37) | -0.11  (-3.29, 3.15) | 0.07  (-5.14, 5.21) | 0.45  (-3.13, 4.08) | -0.43  (-5.93, 4.89) |
| Treatment sessions | 1.39  (-0.6, 3.34) | 0.69  (-4.11, 5.6) | -0.67  (-2.67, 1.35) | -0.78  (-5.86, 4.31) | -2.13  (-4.97, 0.67) | 1.42  (-3.59, 6.52) |

Data are presented as beta (95% CI); The value in bold text denotes a 95% probability that there is evidence of effect modification based on the specified covariate; AT, Acupuncture Therapy; SA, Superficial Acupuncture; NISA, Non-Invasive Sham Acupuncture; NAT, Non-acupuncture Therapy.

**Table S9**. Network meta-regression beta estimates for PSQI at the follow-up visit.

| Covariate | AT vs SA | AT vs NAT | AT vs NISA | SA vs NAT | SA vs NISA | NISA vs NAT |
| --- | --- | --- | --- | --- | --- | --- |
| Year | -0.56  (-4.07, 2.87) | -0.76  (-9.91, 8.45) | -0.89  (-6.25, 4.4) | -0.2  (-9.73, 9.19) | -0.32  (-6.44, 5.72) | 0.41  (-9.63, 10.32) |
| Sample size | 0.54  (-3.28, 4.27) | 0.69  (-9.49, 9.79) | 1.25  (-3.64, 6.21) | 0.24  (-10.14, 9.58) | 0.67  (-5.44, 6.58) | -0.89  (-11.91, 8.82) |
| Treatment sessions | 2.39  (-15.6, 30.02) | 0.75  (-9.64, 12.02) | 1.12  (-4.43, 6.41) | -6.56  (-68.39, 36.02) | -2.08  (-56.99, 49.15) | -0.55  (-11.21, 10.46) |

Data are presented as beta (95% CI); The value in bold text denotes a 95% probability that there is evidence of effect modification based on the specified covariate; AT, Acupuncture Therapy; SA, Superficial Acupuncture; NISA, Non-Invasive Sham Acupuncture; NAT, Non-acupuncture Therapy.

**Table S10**. The quality of evidence for PSQI at treatment endpoint.

| Comparison | | Direct evidence | Indirect evidence | Network meta-analysis |
| --- | --- | --- | --- | --- |
| AT | SA | High | High | High |
| AT | NISA | High | High | High |
| AT | NAT | Moderate  Risk of bias(-1) | Moderate  Risk of bias(-1) | Moderate  Risk of bias(-1) |
| SA | NISA | - | High | Moderate  Imprecision(-1) |
| SA | NAT | - | Moderate  Risk of bias(-1) | Low  Risk of bias(-1)  Imprecision(-1) |
| NISA | NAT | Low  Imprecision(-1)  Risk of bias(-1) | Moderate  Risk of bias(-1) | Low  Risk of bias(-1)  Imprecision(-1) |

AT, Acupuncture Therapy; SA, Superficial Acupuncture; NISA, Non-Invasive Sham Acupuncture; NAT, Non-acupuncture Therapy.

**Table S11**. The quality of evidence for TST at treatment endpoint.

| Comparison | | Direct evidence | Indirect evidence | Network meta-analysis |
| --- | --- | --- | --- | --- |
| AT | SA | Moderate  Imprecision(-1) | Moderate  Imprecision(-1) | Moderate  Imprecision(-1) |
| AT | NISA | Moderate  Imprecision(-1) | Moderate  Imprecision(-1) | Moderate  Imprecision(-1) |
| SA | NISA | - | Moderate  Imprecision(-1) | Low  Imprecision(-1)  Imprecision(-1) |

AT, Acupuncture Therapy; SA, Superficial Acupuncture; NISA, Non-Invasive Sham Acupuncture.

**Table S12**. The quality of evidence for WASO at treatment endpoint.

| Comparison | | Direct evidence | Indirect evidence | Network meta-analysis |
| --- | --- | --- | --- | --- |
| AT | SA | Moderate  Imprecision(-1) | Moderate  Imprecision(-1) | Moderate  Imprecision(-1) |
| AT | NISA | Moderate  Imprecision(-1) | Moderate  Imprecision(-1) | Moderate  Imprecision(-1) |
| SA | NISA | - | Moderate  Imprecision(-1) | Low  Imprecision(-1)  Imprecision(-1) |

AT, Acupuncture Therapy; SA, Superficial Acupuncture; NISA, Non-Invasive Sham Acupuncture.

**Table S13**. The quality of evidence for SE at treatment endpoint.

| Comparison | | Direct evidence | Indirect evidence | Network meta-analysis |
| --- | --- | --- | --- | --- |
| AT | SA | Low  Reporting bias(-1)  Imprecision(-1) | Low  Reporting bias(-1)  Imprecision(-1) | Low  Reporting bias(-1)  Imprecision(-1) |
| AT | NISA | Low  Reporting bias(-1)  Imprecision(-1) | Low  Reporting bias(-1)  Imprecision(-1) | Low  Reporting bias(-1)  Imprecision(-1) |
| SA | NISA | - | Low  Reporting bias(-1)  Imprecision(-1) | Very Low  Reporting bias(-1)  Imprecision(-1)  Imprecision(-1) |

AT, Acupuncture Therapy; SA, Superficial Acupuncture; NISA, Non-Invasive Sham Acupuncture.

**Table S14**. The quality of evidence for PSQI at the follow-up visit.

| Comparison | | Direct evidence | Indirect evidence | Network meta-analysis |
| --- | --- | --- | --- | --- |
| AT | SA | Low  Risk of bias(-1)  Reporting bias(-1) | Low  Risk of bias(-1)  Reporting bias(-1) | Low  Risk of bias(-1)  Reporting bias(-1) |
| AT | NISA | Moderate  Reporting bias(-1) | Moderate  Reporting bias(-1) | Moderate  Reporting bias(-1) |
| AT | SC | Low  Risk of bias(-1)  Reporting bias(-1) | Low  Risk of bias(-1)  Reporting bias(-1) | Low  Risk of bias(-1)  Reporting bias(-1) |
| SA | NISA | - | Low  Risk of bias(-1)  Reporting bias(-1) | Very Low  Risk of bias(-1)  Reporting bias(-1)  Imprecision(-1) |
| SA | SC | - | Low  Risk of bias(-1)  Reporting bias(-1) | Very Low  Risk of bias(-1)  Reporting bias(-1)  Imprecision(-1) |
| NISA | SC | Very Low  Risk of bias(-1)  Reporting bias(-1)  Imprecision(-1) | Low  Risk of bias(-1)  Reporting bias(-1) | Very Low  Risk of bias(-1)  Reporting bias(-1)  Imprecision(-1) |

AT, Acupuncture Therapy; SA, Superficial Acupuncture; NISA, Non-Invasive Sham Acupuncture; NAT, Non-acupuncture Therapy.

**Figure S1**. Risk of bias summary for all included studies


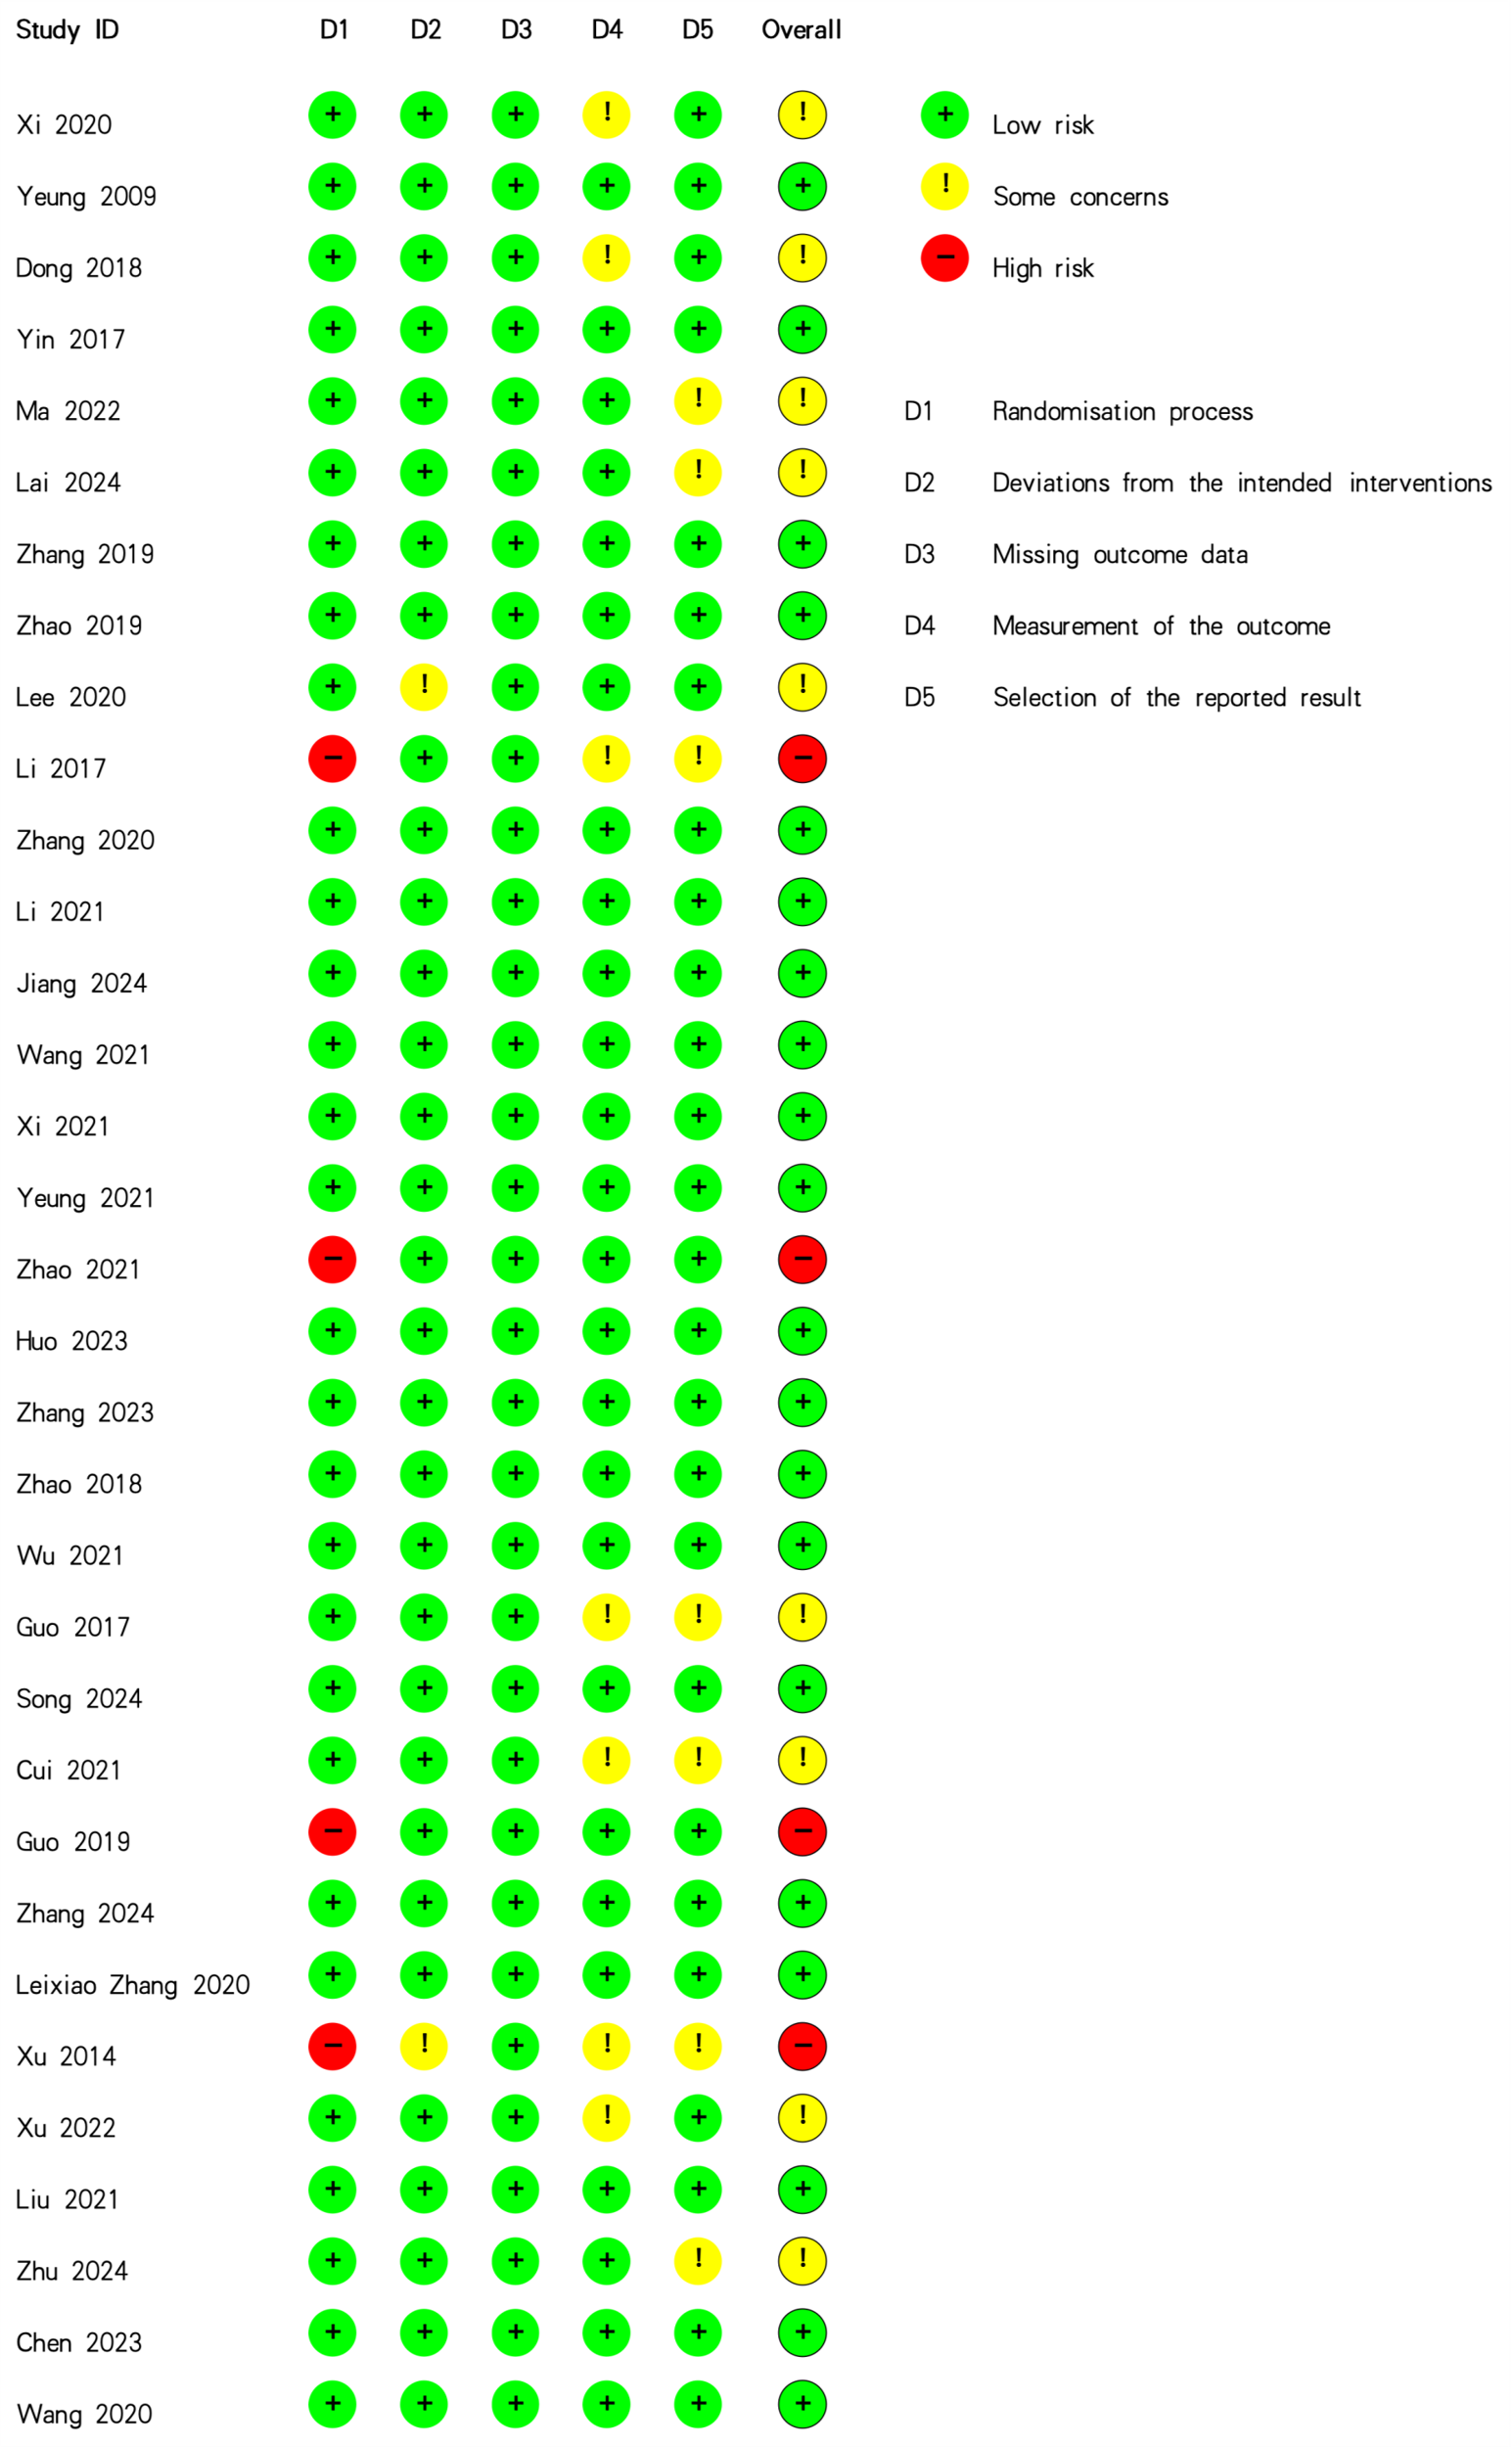


Notes: ROB figure adapted from Higgins JP, Altman DG, Gøtzsche PC, Jüni P, Moher D, Oxman AD, Savovic J, Schulz KF, Weeks L, Sterne JA; Cochrane Bias Methods Group; Cochrane Statistical Methods Group. The Cochrane Collaboration's tool for assessing risk of bias in randomised trials. BMJ. 2011 Oct 18;343:d5928.44

**Figure S2**. Funnel plot for PSQI at treatment endpoint.


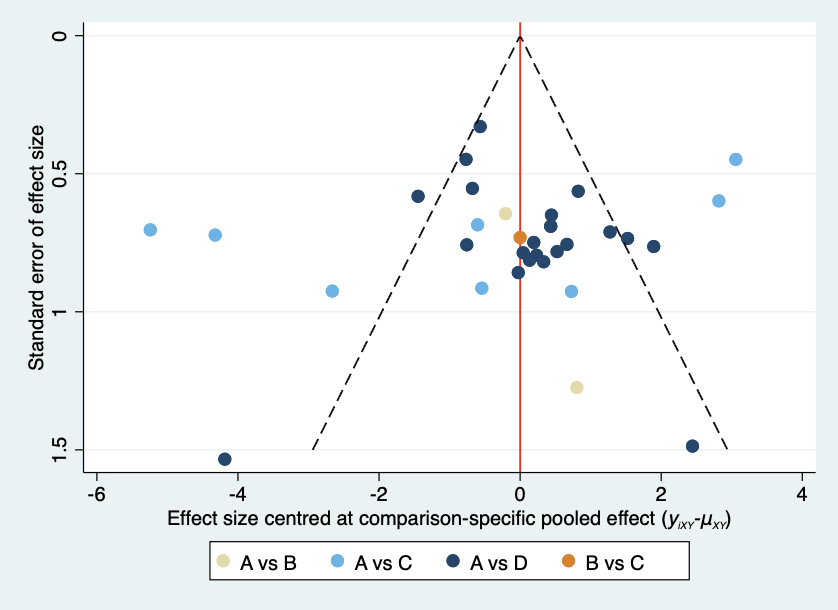


A, Acupuncture Therapy; B, Non-acupuncture Therapy; C, Non-Invasive Sham Acupuncture; D, Superficial Acupuncture.

**Figure S3**. Network plot and league table for PSQI at the follow-up visit.


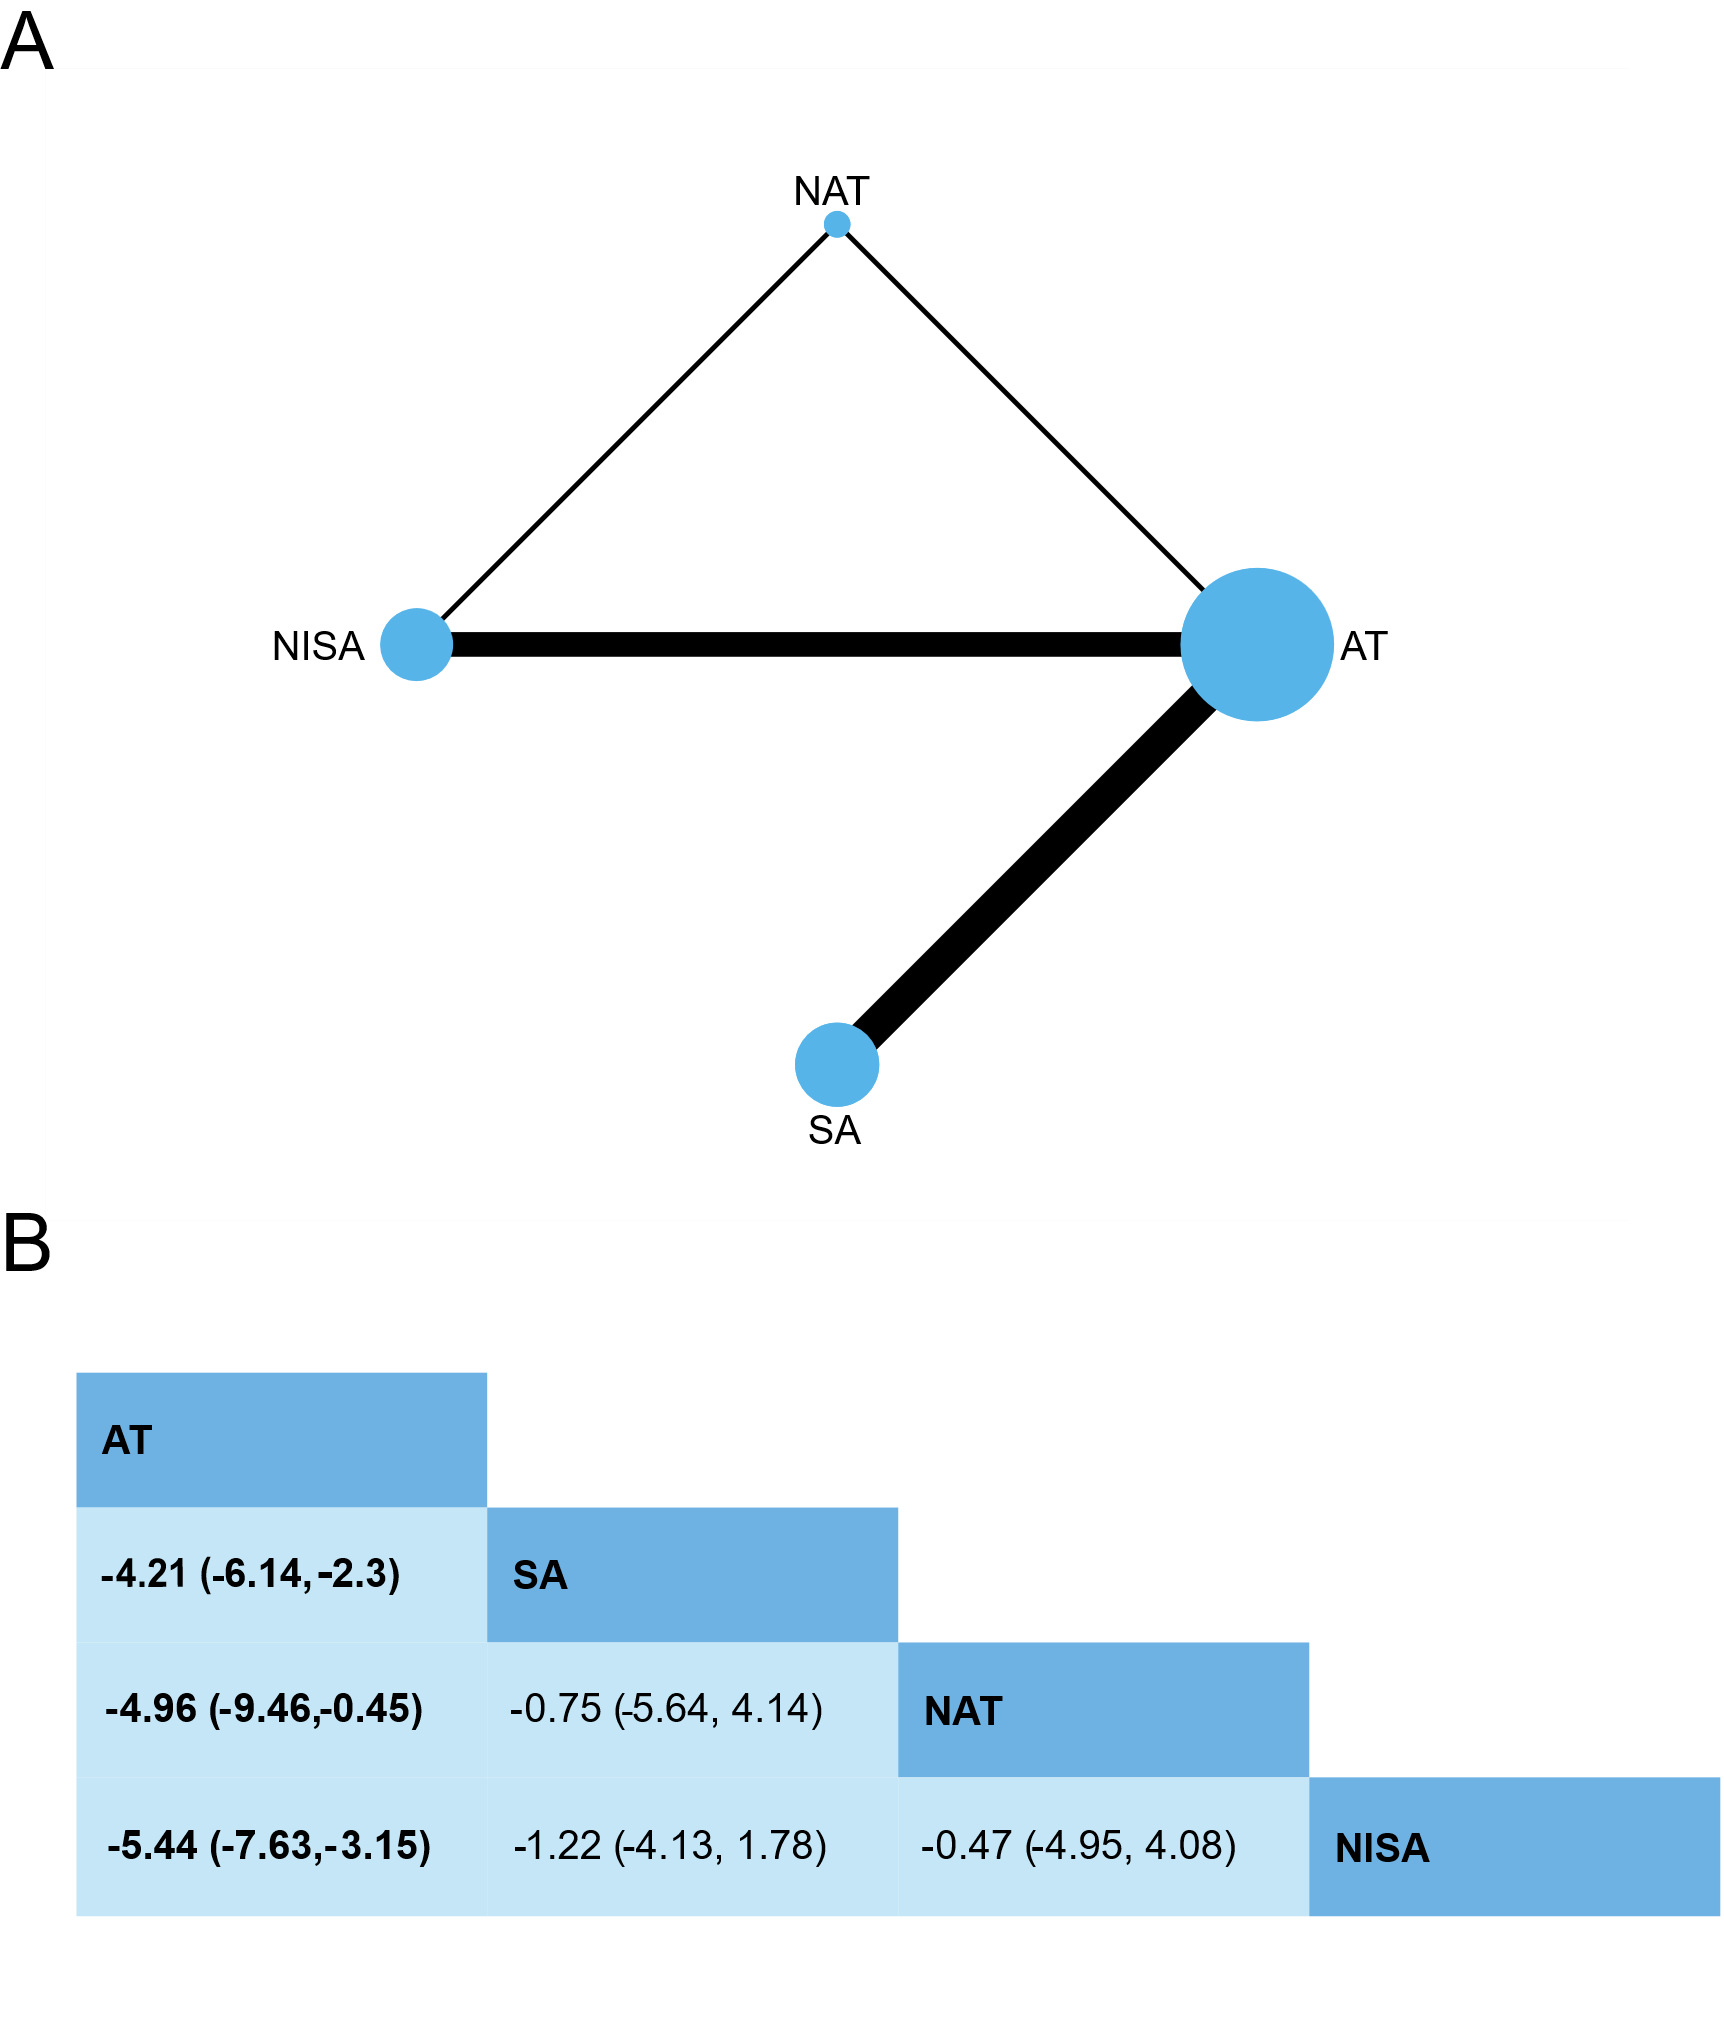


(A) Network plot for PSQI at the follow-up visit.

Node (circle) sizes indicate the number of studies, and edge (line) widths represent the number of direct comparisons. AT, Acupuncture Therapy; SA, Superficial Acupuncture; NISA, Non-Invasive Sham Acupuncture; NAT, Non-acupuncture Therapy.

(B) League table for PSQI at the follow-up visit.

Estimates are presented as mean difference (MD) and 95% credible intervals (CI). Comparisons between treatments should be read from left to right. The estimate of intervention effectiveness is located at the intersection of the column-defining intervention and the row-defining intervention. Significant results are presented in bold.

**Figure S4**. Funnel plot for PSQI at the follow-up visit.


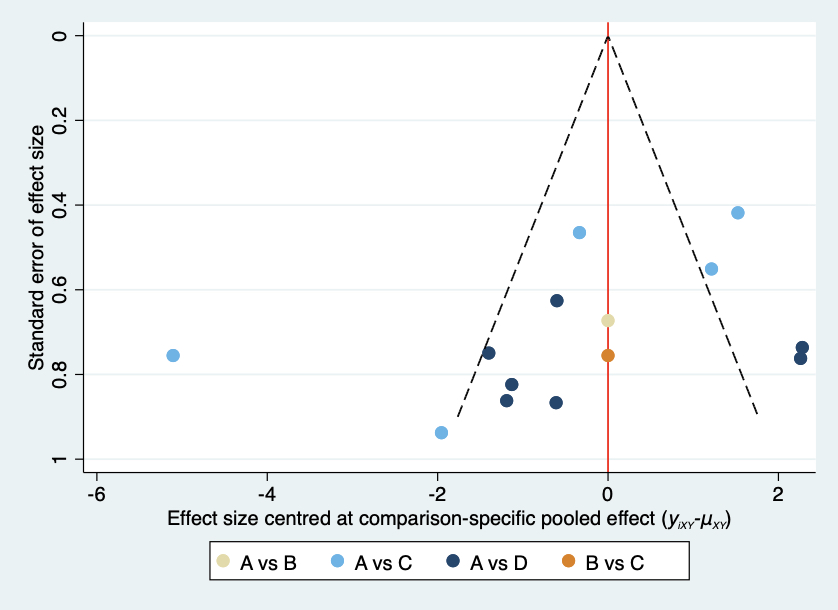


A, Acupuncture Therapy; B, Non-acupuncture Therapy; C, Non-Invasive Sham Acupuncture; D, Superficial Acupuncture.

**Figure S5**. SUCRA plot for PSQI at the follow-up visit.


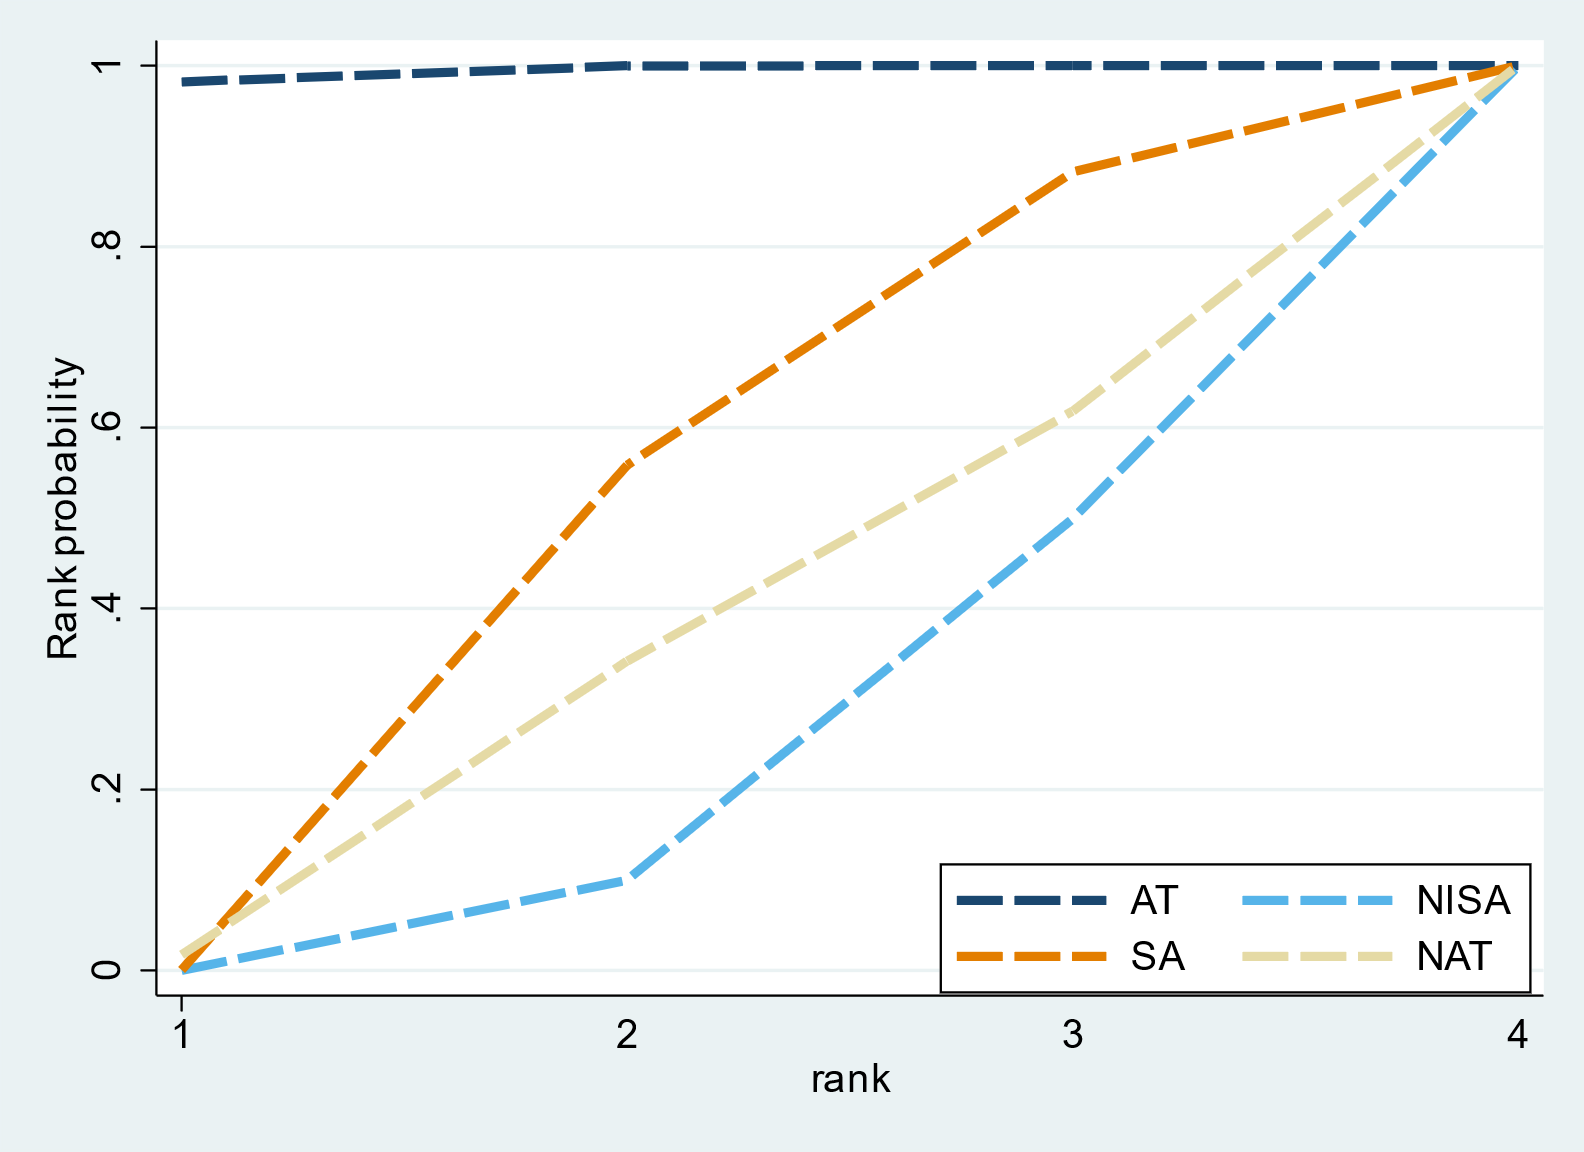


AT, Acupuncture Therapy; SA, Superficial Acupuncture; NISA, Non-Invasive Sham Acupuncture; NAT, Non-acupuncture Therapy.

*SUCRA is a numeric presentation of the overall ranking and presents a single number associated with each treatment. SUCRA values range from 0 to 1. The higher the SUCRA value, and the closer to 1, the higher the likelihood that a therapy is in the top rank or one of the top ranks; the closer to 0 the SUCRA value, the more likely that a therapy is in the bottom rank, or one of the bottom ranks.

**Figure S6**. Network plot and league table for TST at treatment endpoint.


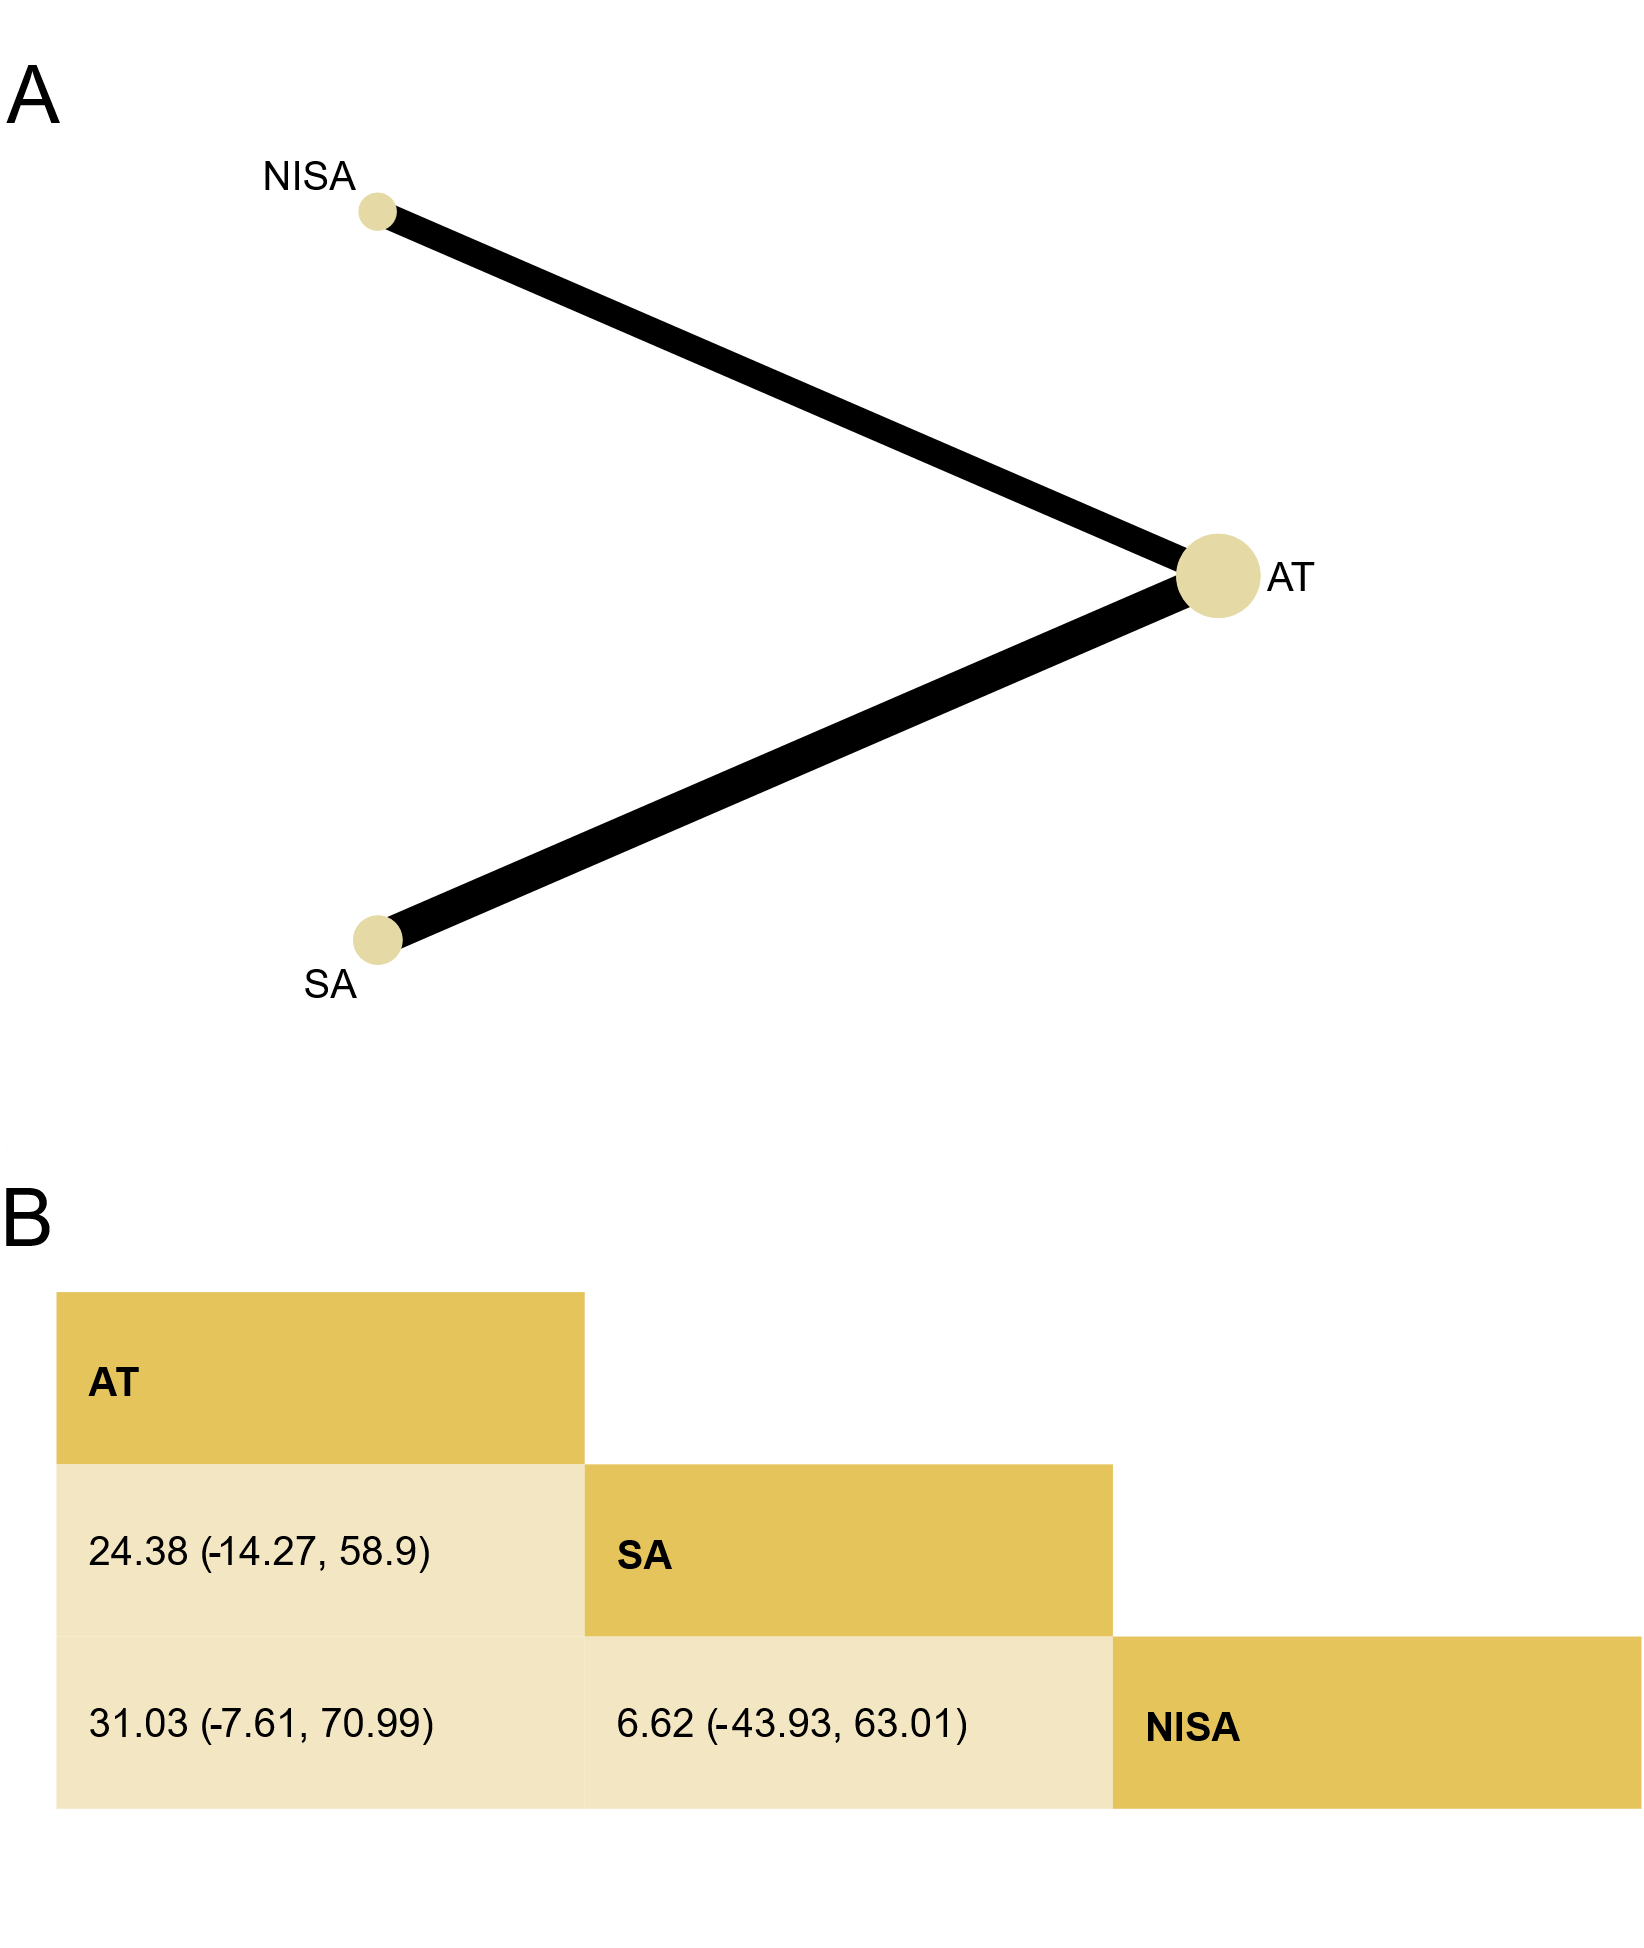


(A) Network plot for TST at treatment endpoint.

Node (circle) sizes indicate the number of studies, and edge (line) widths represent the number of direct comparisons. AT, Acupuncture Therapy; SA, Superficial Acupuncture; NISA, Non-Invasive Sham Acupuncture.

(B) League table for TST at treatment endpoint.

Estimates are presented as mean difference (MD) and 95% credible intervals (CI). Comparisons between treatments should be read from left to right. The estimate of intervention effectiveness is located at the intersection of the column-defining intervention and the row-defining intervention. Significant results are presented in bold.

**Figure S7**. Funnel plot for TST at treatment endpoint.


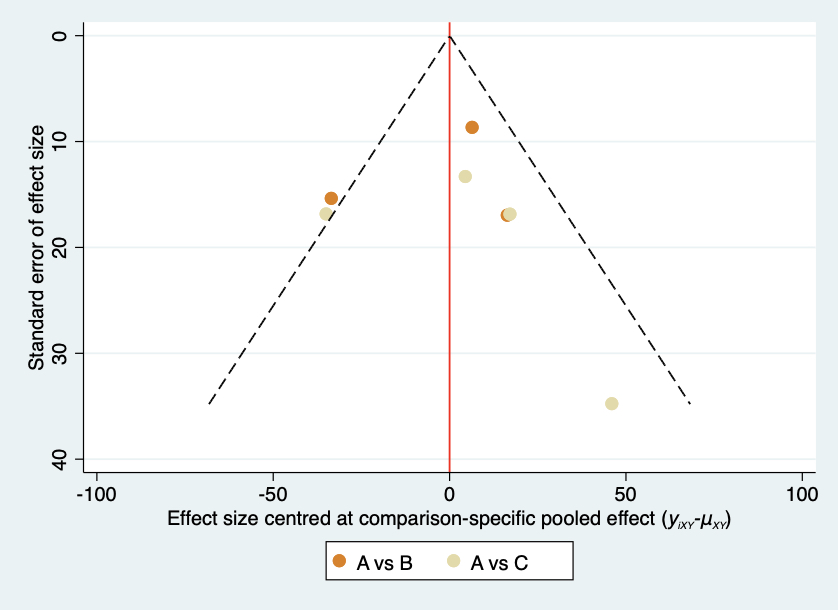


A, Acupuncture Therapy; B, Non-Invasive Sham Acupuncture; C, Superficial Acupuncture.

**Figure S8**. SUCRA plot for TST at treatment endpoint.


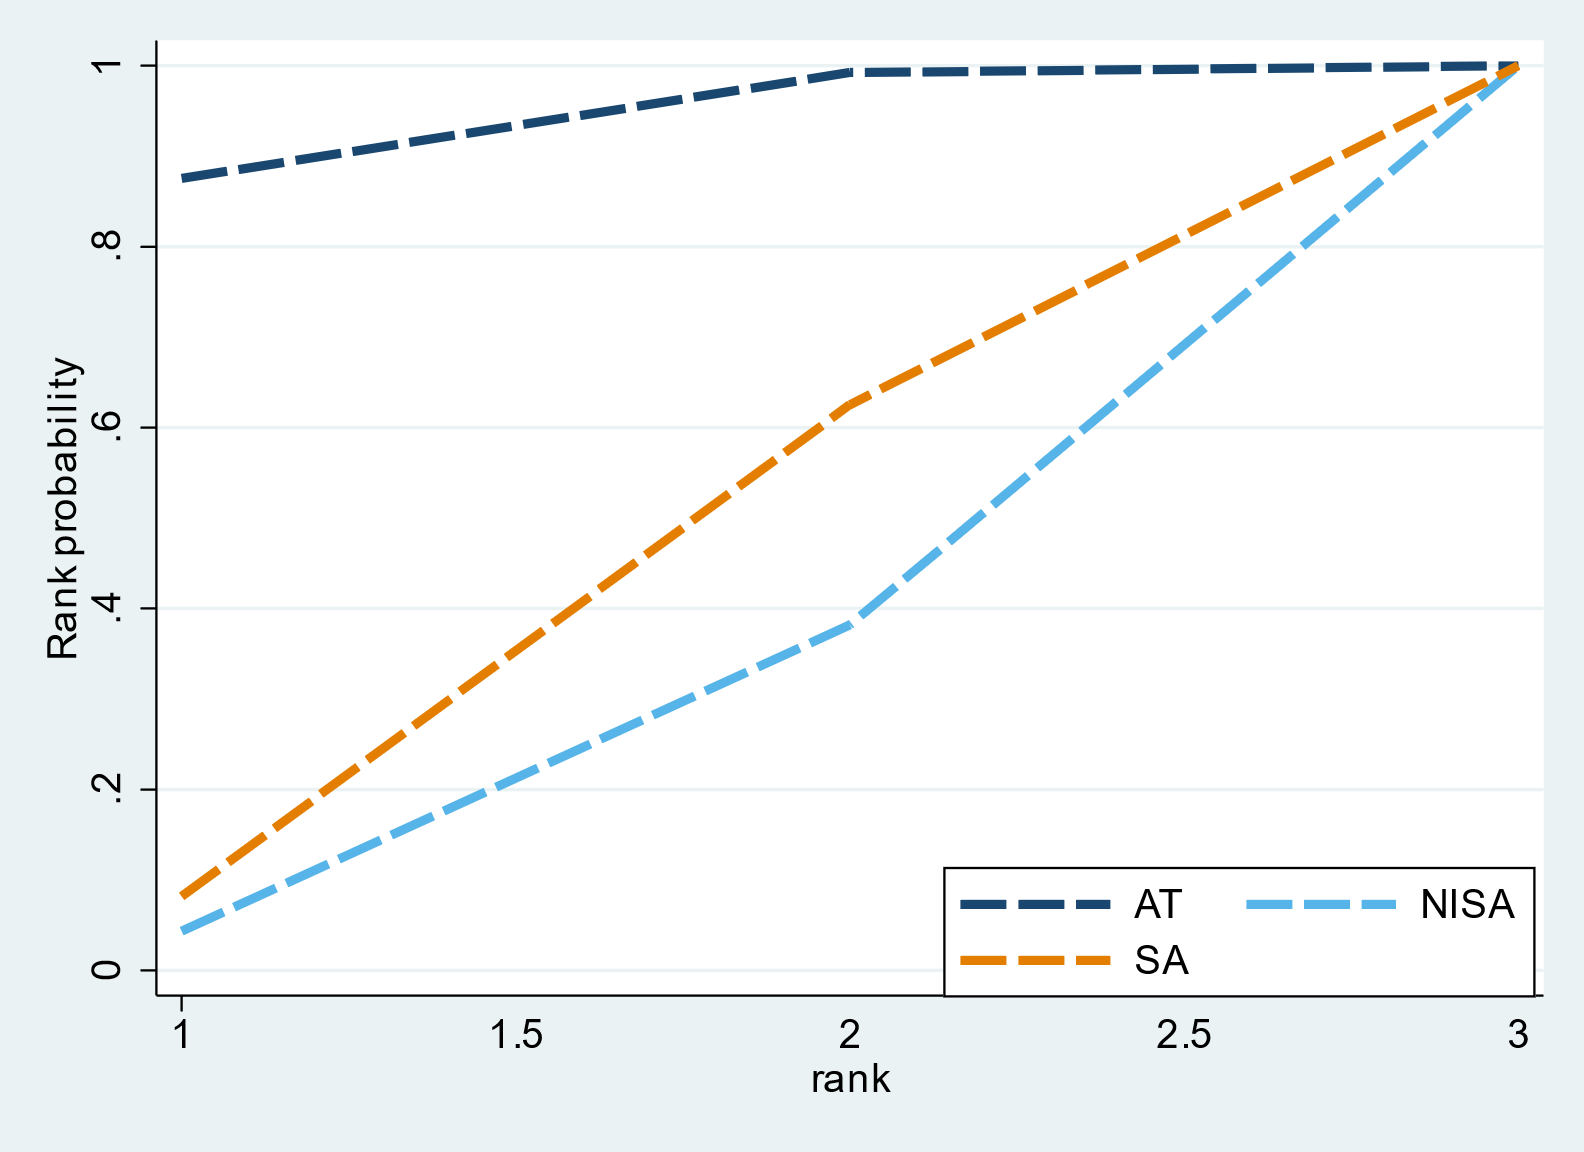


AT, Acupuncture Therapy; SA, Superficial Acupuncture; NISA, Non-Invasive Sham Acupuncture.

*SUCRA is a numeric presentation of the overall ranking and presents a single number associated with each treatment. SUCRA values range from 0 to 1. The higher the SUCRA value, and the closer to 1, the higher the likelihood that a therapy is in the top rank or one of the top ranks; the closer to 0 the SUCRA value, the more likely that a therapy is in the bottom rank, or one of the bottom ranks.

**Figure S9**. Network plot and league table for SE at treatment endpoint.


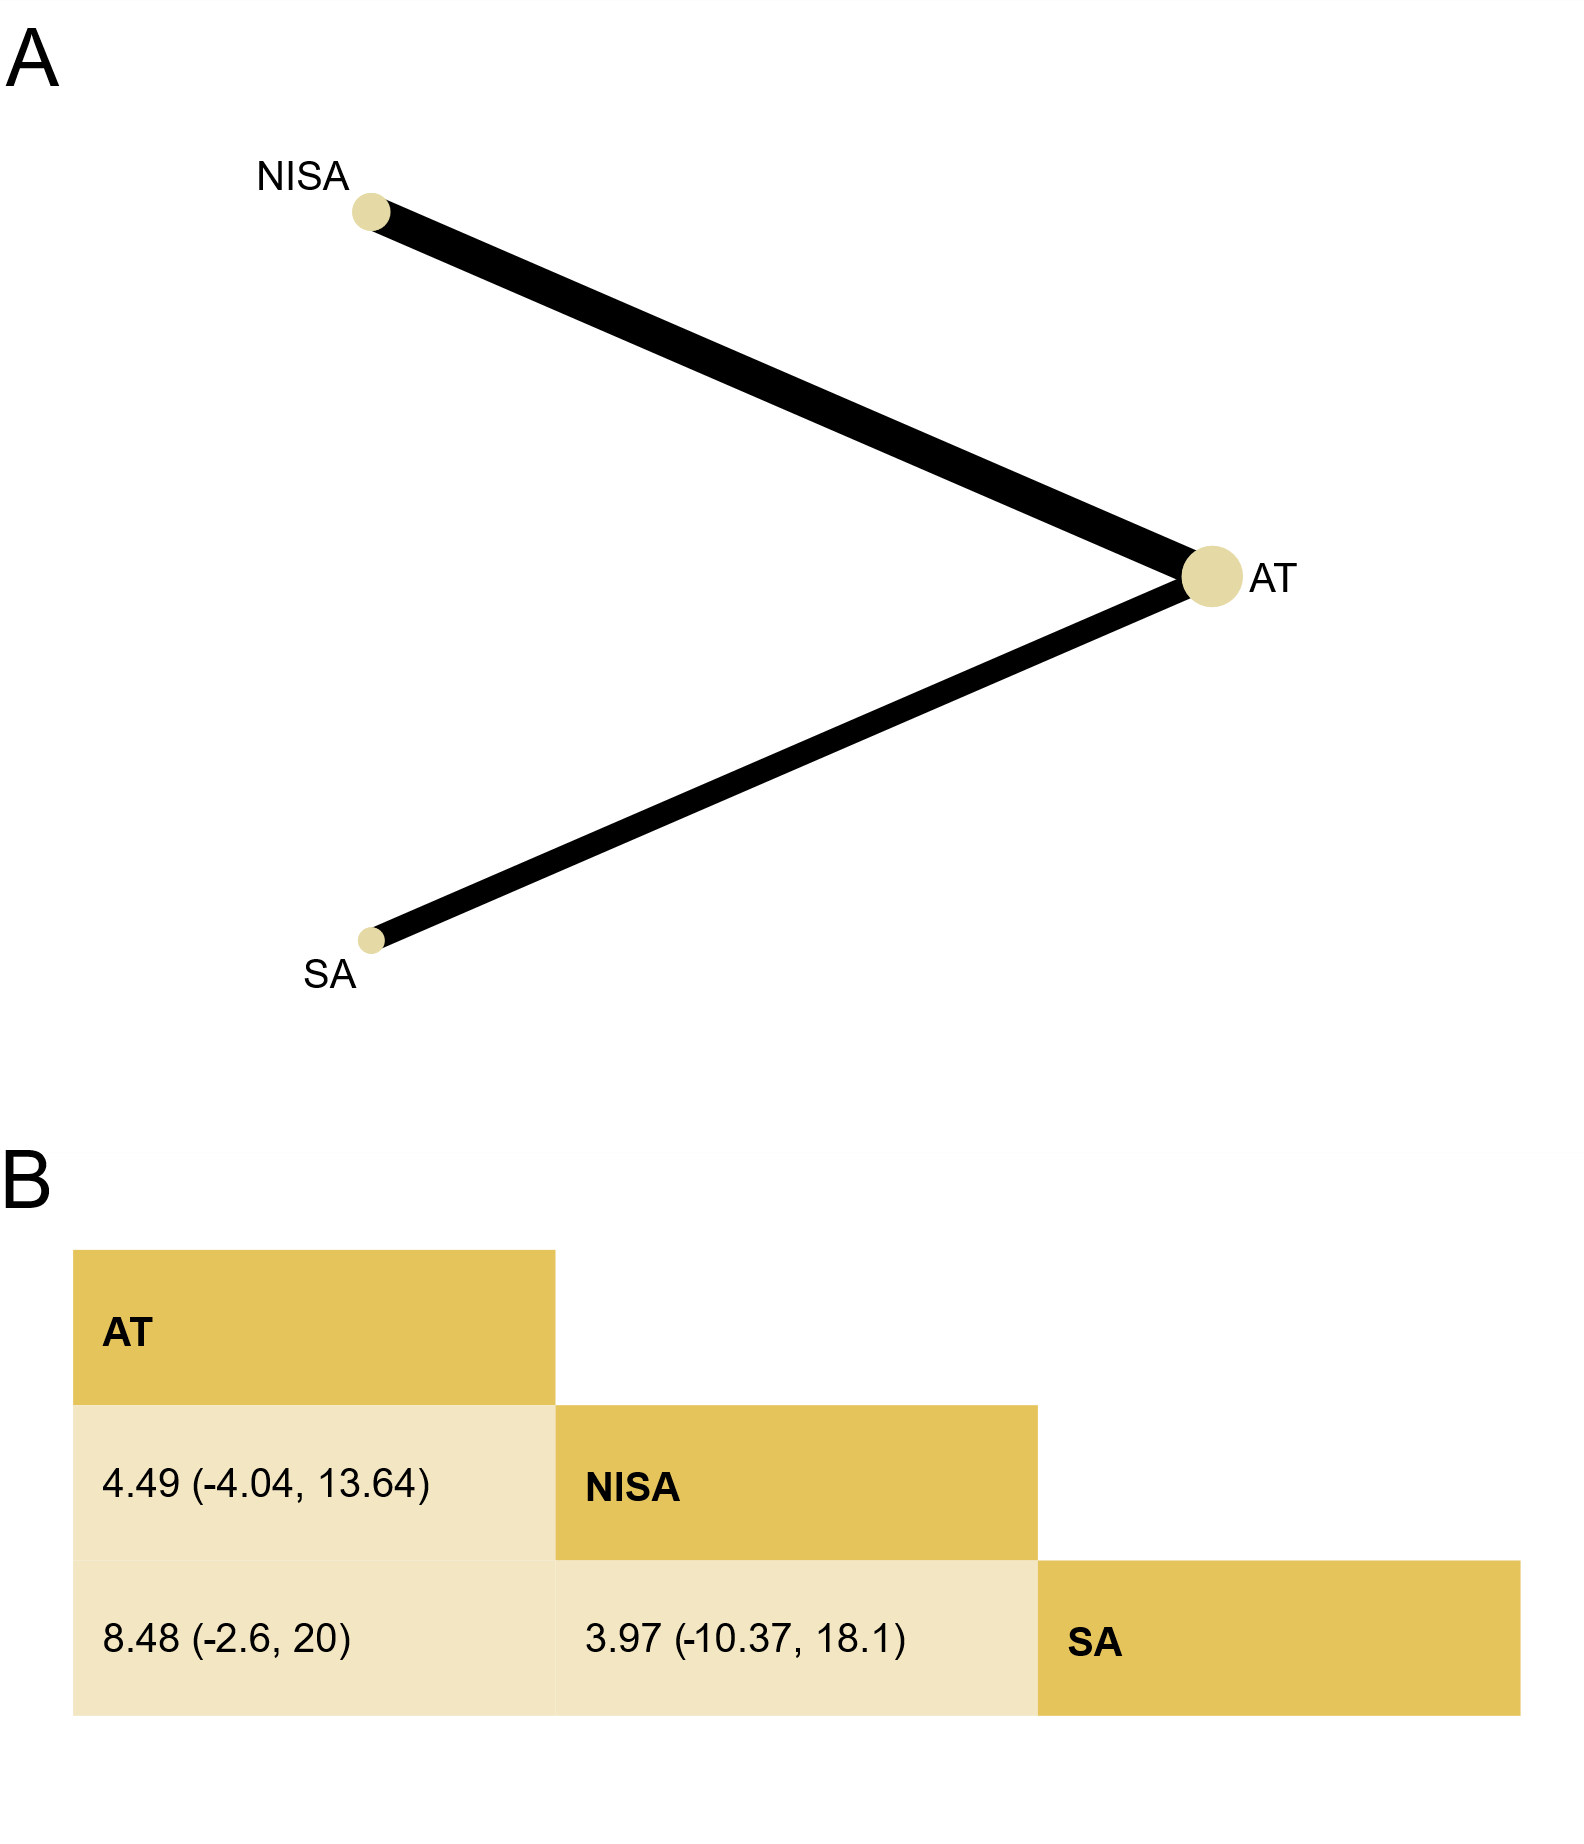


(A) Network plot for SE at treatment endpoint.

Node (circle) sizes indicate the number of studies, and edge (line) widths represent the number of direct comparisons. AT, Acupuncture Therapy; SA, Superficial Acupuncture; NISA, Non-Invasive Sham Acupuncture.

(B) League table for SE at treatment endpoint.

Estimates are presented as mean difference (MD) and 95% credible intervals (CI). Comparisons between treatments should be read from left to right. The estimate of intervention effectiveness is located at the intersection of the column-defining intervention and the row-defining intervention. Significant results are presented in bold.

**Figure S10**. Funnel plot for SE at treatment endpoint.


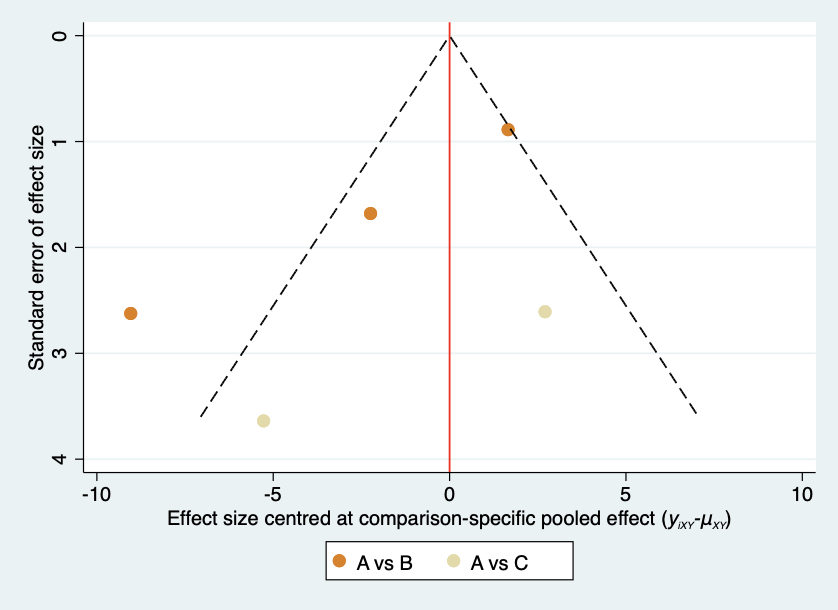


A, Acupuncture Therapy; B, Non-Invasive Sham Acupuncture; C, Superficial Acupuncture.

**Figure S11**. SUCRA plot for SE at treatment endpoint.


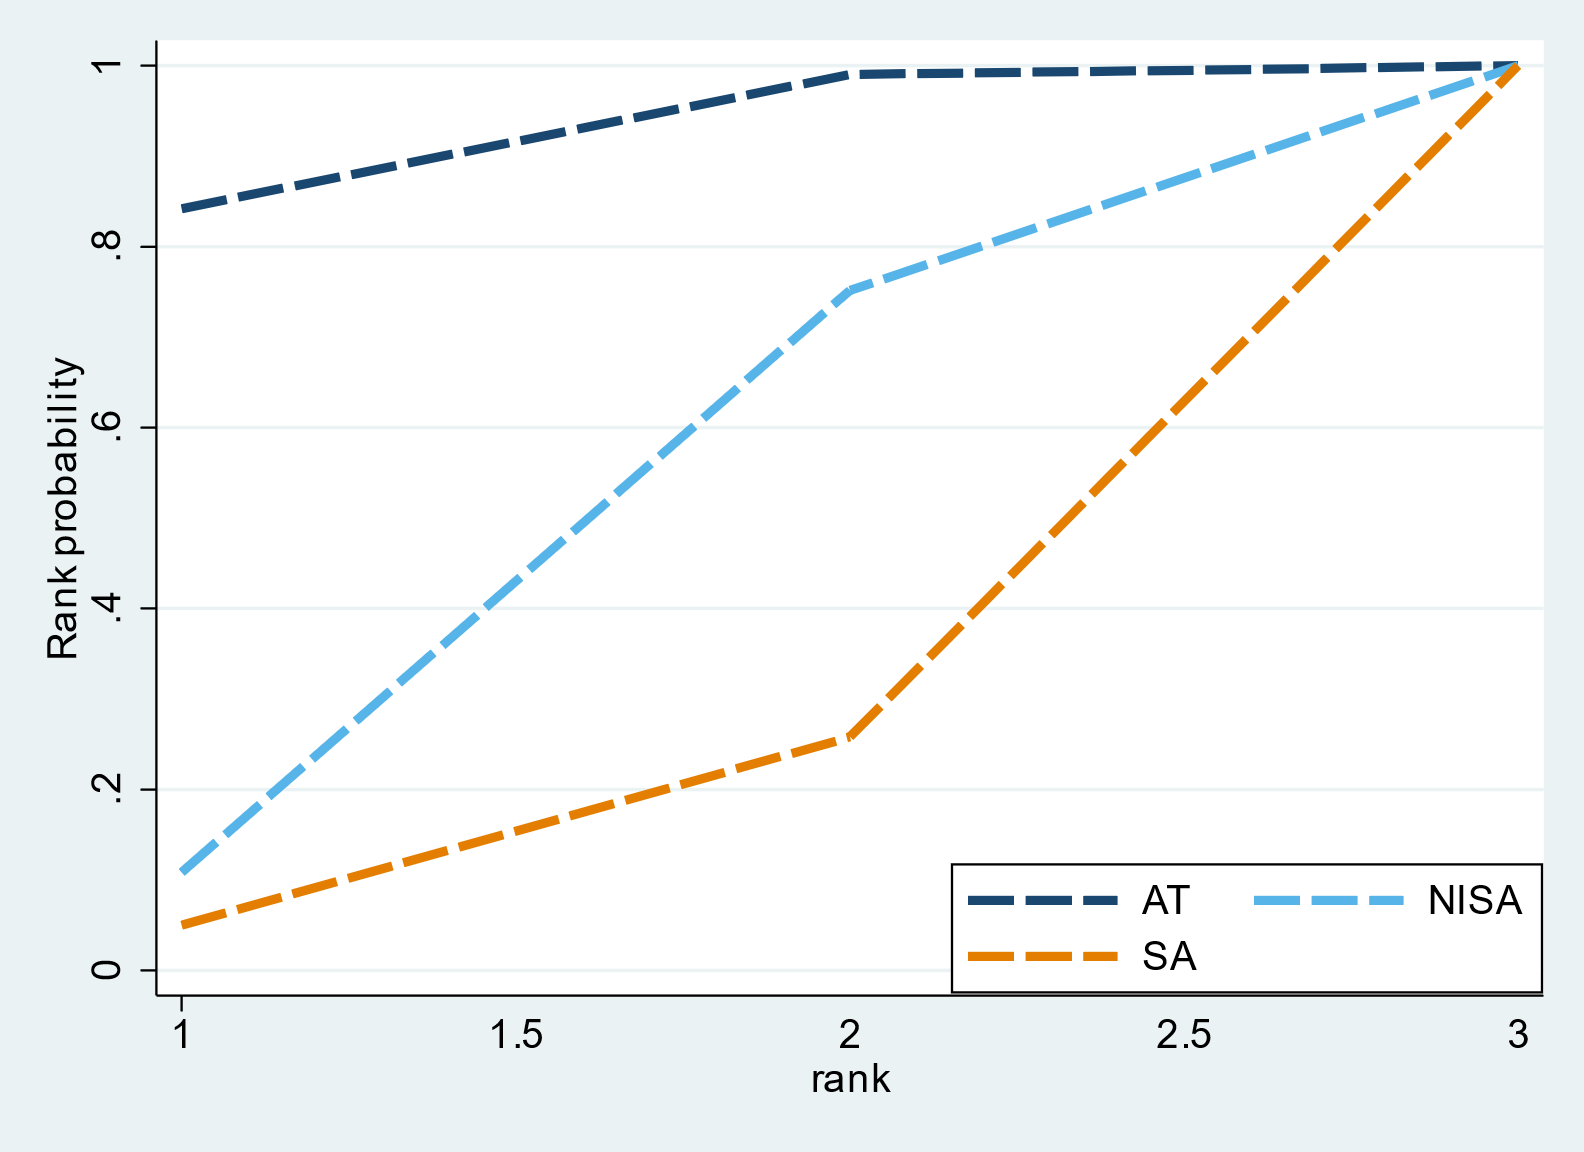


AT, Acupuncture Therapy; SA, Superficial Acupuncture; NISA, Non-Invasive Sham Acupuncture.

*SUCRA is a numeric presentation of the overall ranking and presents a single number associated with each treatment. SUCRA values range from 0 to 1. The higher the SUCRA value, and the closer to 1, the higher the likelihood that a therapy is in the top rank or one of the top ranks; the closer to 0 the SUCRA value, the more likely that a therapy is in the bottom rank, or one of the bottom ranks.

**Figure S12**. Network plot and league table for WASO at treatment endpoint.


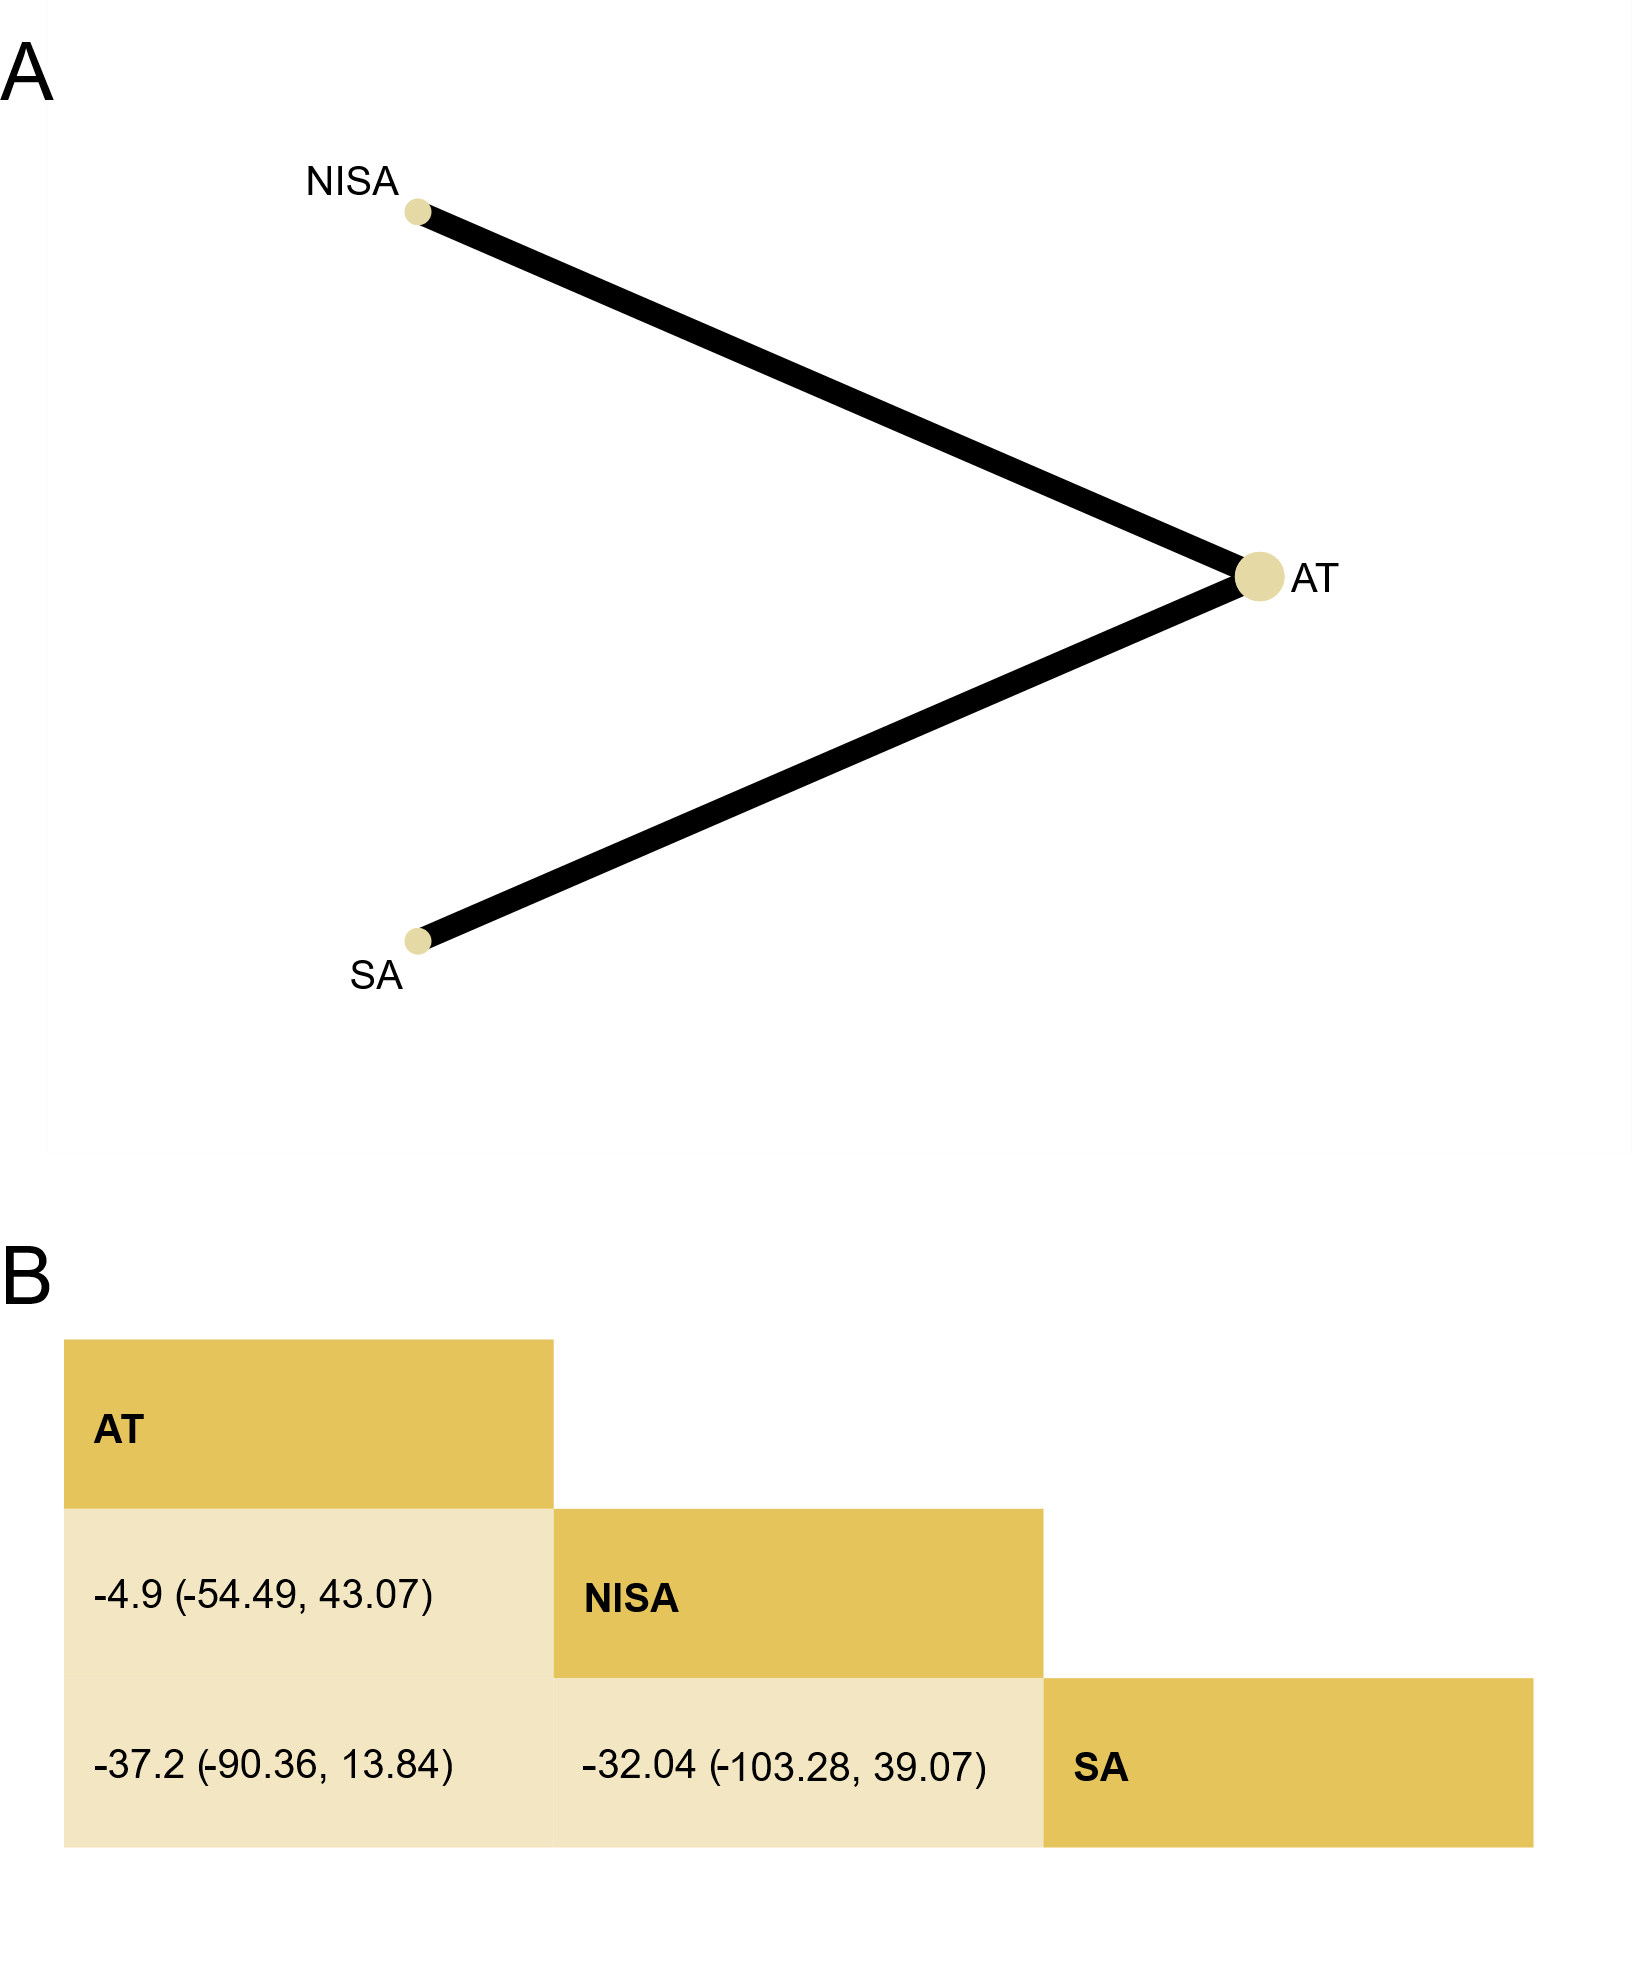


(A) Network plot for WASO at treatment endpoint.

Node (circle) sizes indicate the number of studies, and edge (line) widths represent the number of direct comparisons. AT, Acupuncture Therapy; SA, Superficial Acupuncture; NISA, Non-Invasive Sham Acupuncture.

(B) League table for WASO at treatment endpoint.

Estimates are presented as mean difference (MD) and 95% credible intervals (CI). Comparisons between treatments should be read from left to right. The estimate of intervention effectiveness is located at the intersection of the column-defining intervention and the row-defining intervention. Significant results are presented in bold.

**Figure S13**. Funnel plot for WASO at treatment endpoint.


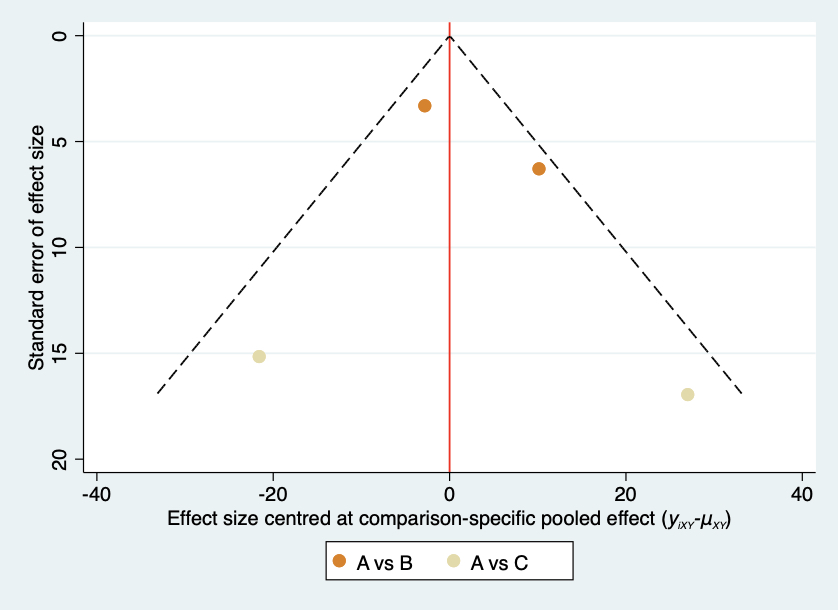


A, Acupuncture Therapy; B, Non-Invasive Sham Acupuncture; C, Superficial Acupuncture.

**Figure S14**. SUCRA plot for WASO at treatment endpoint.


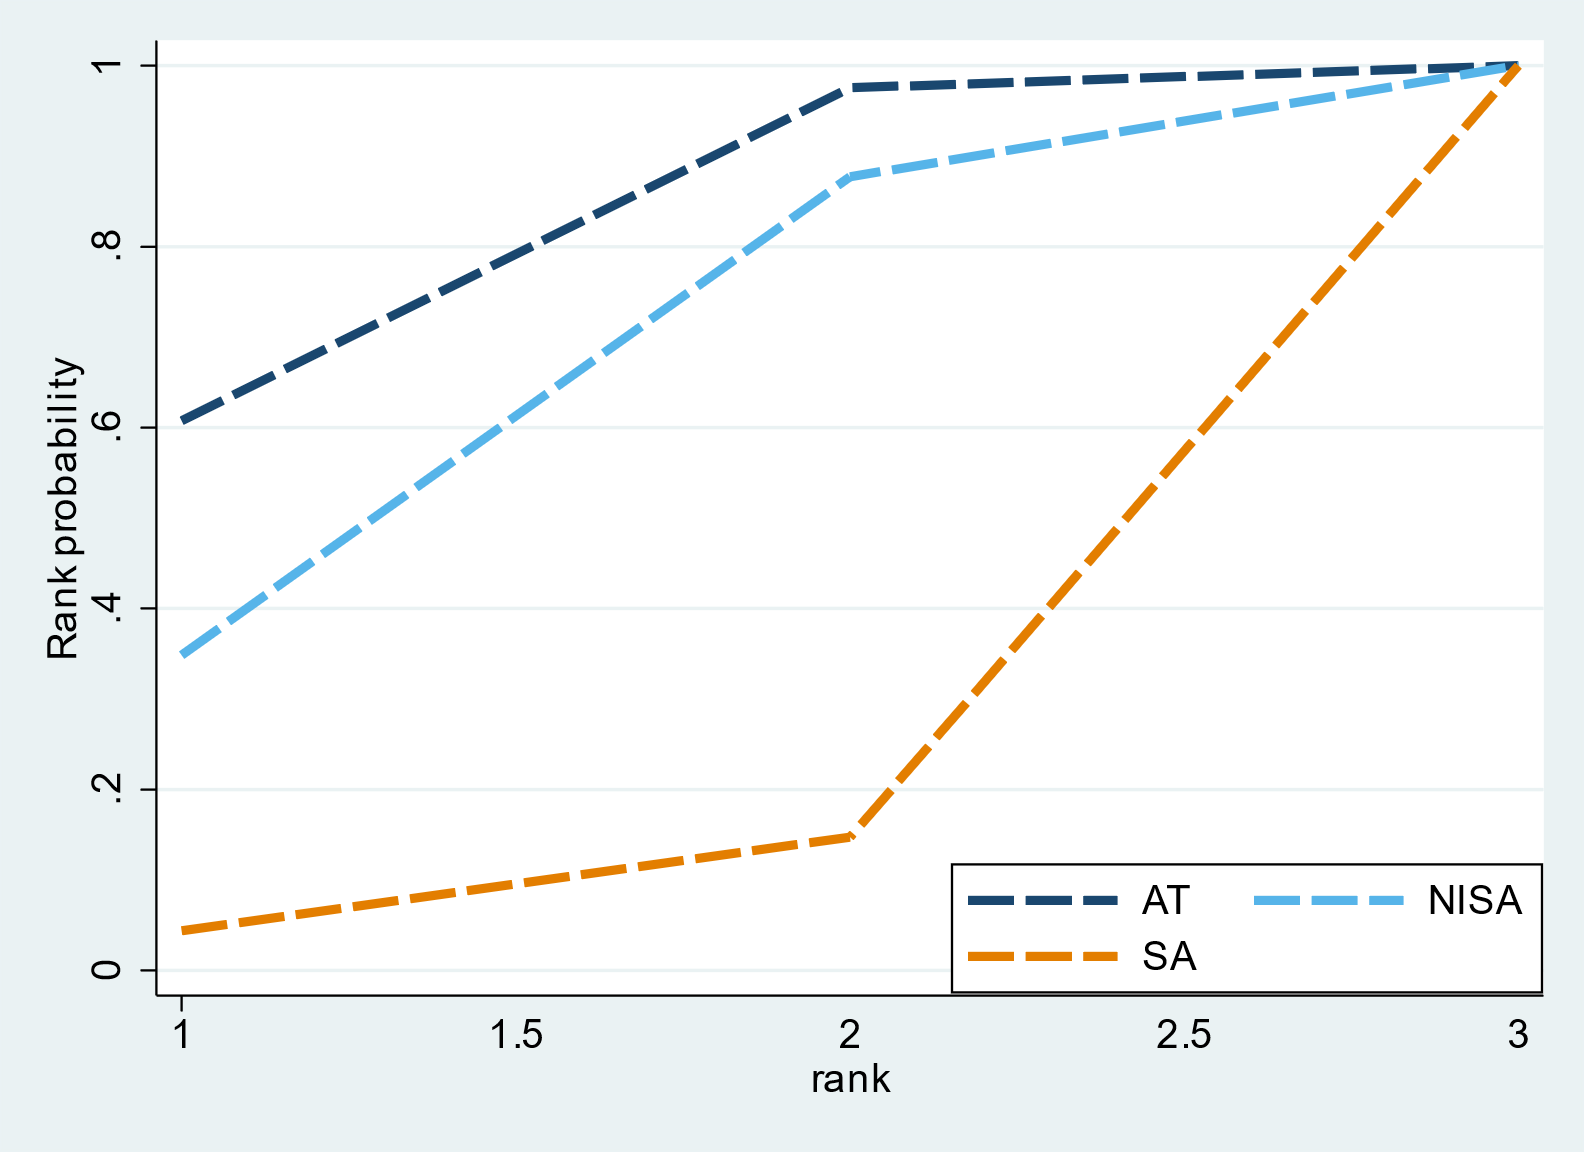


AT, Acupuncture Therapy; SA, Superficial Acupuncture; NISA, Non-Invasive Sham Acupuncture.

*SUCRA is a numeric presentation of the overall ranking and presents a single number associated with each treatment. SUCRA values range from 0 to 1. The higher the SUCRA value, and the closer to 1, the higher the likelihood that a therapy is in the top rank or one of the top ranks; the closer to 0 the SUCRA value, the more likely that a therapy is in the bottom rank, or one of the bottom ranks.

**References**

1. Chung KF, Yeung WF, Yu BYM, et al. Acupuncture with or without combined auricular acupuncture for insomnia: a randomised, waitlist-controlled trial. Article. Acupuncture in medicine : journal of the British Medical Acupuncture Society. 2018;36(1):2-13. doi:10.1136/acupmed-2017-011371

2. Yeung WF, Chung KF, Zhang ZJ, et al. Electroacupuncture for tapering off long-term benzodiazepine use: A randomized controlled trial. Article. Journal of Psychiatric Research. 2019;109:59-67. doi:10.1016/j.jpsychires.2018.11.015

3. Lu Y, Lai C, Lu P, Peng Y, Bao Z, Luo H. Acupuncture Treatment for Insomnia and its Effect on Serum TNF-α, IL-6, and IL-1β levels. Article. Acupuncture and Electro-Therapeutics Research. 2022;47(2):183-194. doi:10.3727/036012921X16287835103453

4. Wang C, Xu WL, Li GW, et al. Impact of Acupuncture on Sleep and Comorbid Symptoms for Chronic Insomnia: A Randomized Clinical Trial. Nat Sci Sleep. 2021;13:1807-1822. doi:10.2147/nss.S326762

5. Guo J, Wang LP, Liu CZ, et al. Efficacy of acupuncture for primary insomnia: a randomized controlled clinical trial. Evid Based Complement Alternat Med. 2013;2013:163850. doi:10.1155/2013/163850

6. Saletu-Zyhlarz GM, Meng A, Anderer P, et al. Acute and chronic effects of electroacupuncture in primary insomnia: placebo-controlled clinical, polysomnographic, EEG topographic/tomographic and psychometric studies. Journal article; Conference proceeding. Clinical EEG and neuroscience. 2020;51(3):NP21‐NP22. doi:10.1177/1550059415622686

7. Lee SI, Hwa LJ, Moon K, et al. Analysis of Quantitative Electroencephalography (QEEG) Following Acupuncture Treatment in Patients with Insomnia: Z Scored Absolute Power and sLORETA. research-article. The Korean Society of Oriental Neuropsychiatry. 2016 2016;27(3):169-184.

8. Quan Z, Dayan Y, Xiao CUI, Kanrong Y, Jie LI, Canghuan Z. Cerebral fMRI in observation on the therapeutic mechanism of electro-acupuncture on Shenmen and Sanyinjiao for insomnia. Chinese Jorunal of Interventional Imaging and Therapy. 2011 2011;8(3):204-207. 1672-8475(2011)8:3<204:Nfgcdz>2.0.Tx;2-2.

9. Chang JS, Liu HP, Lin WY. Acupuncture at SP6 Point in Lower Extremities Improved Patients' Insomnia, Which Was Also Shown Through Ryodoraku Electrical Measurements. Acupunct Electrother Res. 2016;41(2):79-93. doi:10.3727/036012916x14666839504550

10. Minghui G, Aixia L, Ping Y, et al. The effect of regulating and tranquilising acupuncture on the quality of life of patients with primary insomnia. Journal of Sichuan of Traditional Chinese Medicine. 2016;(5)2017450031.

11. Xi HQ, Wu WZ, Liu CY, Wang XQ, Li JH. Effect of Tongdu Tiaoshen needling in treatment of chronic insomnia by regulating the hypothalamic-pituitary-adrenal axis. Acupuncture research. 2020;45(7):552-556. doi:10.13702/j.1000-0607.190791

12. Yeung WF, Chung KF, Zhang SP, Yap TG, Law ACK. Electroacupuncture for primary insomnia: A randomized controlled trial. Article. Sleep. 2009;32(8):1039-1047. doi:10.1093/sleep/32.8.1039

13. Dong B, Chen ZQ, Jie MA. Clinical Curative Observation of Applying Acupuncture at Yintang (EX-HN3),Baihui (Du20) and Dazhui (Du14) with Periosteal Puncture Method in the Treatment of Primary Insomnia. Journal of Sichuan of Traditional Chinese Medicine. 2018;

14. Yin X, Gou M, Xu J, et al. Efficacy and safety of acupuncture treatment on primary insomnia: a randomized controlled trial. Journal article. Sleep medicine. 2017;37:193‐200. doi:10.1016/j.sleep.2017.02.012

15. Ma Y, Pang R, Teng R, Song J, Shi Y, Wu X. Effect of scalp acupuncture on sleep quality in patients with chronic insomnia. Journal of Changchun University of Chinese Medicine. 2022;38(12)2023119740. doi:10.13463/j.cnki.cczyy.2022.12.014

16. Lai CH. Clinical Research on the Treatment of Paradoxical Insomnia with Acupuncture for Regulating the Mind and Inducing Sleep. Inner Mongolia Journal of Traditional Chinese Medicine. 2024;43(4)2024314461. doi:10.16040/j.cnki.cn15-1101.2024.04.063

17. Zhang F, Tang Q, Guo J, et al. Effects of "Old Ten Needles" Acupoints Group on Sleep Quality and Excessive Arousal in Patients with Chronic Insomnia. Effects of "Old Ten Needles" Acupoints Group on Sleep Quality and Excessive Arousal in Patients with Chronic Insomnia. Journal of Traditional Chinese Medicine. 2019 2019;60(8):671-674. 1001-1668(2019)60:8<671:Lszzxd>2.0.Tx;2-a. doi:10.13288/j.11-2166/r.2019.08.010

18. Zhao FY, Xu H, Hong YF, et al. Attention network function of insomniacs improved by manual acupuncture: Evidence from Attention Network Task. Article. World Journal of Acupuncture - Moxibustion. 2019;29(2):91-96. doi:10.1016/j.wjam.2019.05.006

19. Lee B, Kim BK, Kim HJ, et al. Efficacy and Safety of Electroacupuncture for Insomnia Disorder: A Multicenter, Randomized, Assessor-Blinded, Controlled Trial. Nature and Science of Sleep. 2020 2020;12:1145-1159. doi:10.2147/nss.S281231

20. Li HQ, Zou YH, Guo J, Wei J, Cao KG. 30 cases of primary insomnia treated by ‘Zhou's method of regulating the spirit and acupuncture’. Global Traditional Chinese Medicine. 2017;10(7)2017522119. doi:10.3969/j.issn.1674-749.2017.07.033

21. Zhang L, Tang Y, Hui R, et al. The effects of active acupuncture and placebo acupuncture on insomnia patients: a randomized controlled trial. Journal article. Psychology, health & medicine. 2020;25(10):1201‐1215. doi:10.1080/13548506.2020.1738015

22. Li JH, Wu WZ, Liu CY, et al. Effect of Tiaoshen needling on plasma melatonin and cortisol in patients with chronic insomnia. Randomized Controlled Trial. Acupuncture research. 2021-Aug-25 2021;46(8):690-4. doi:10.13702/j.1000-0607.201009

23. Jiang TF, Chen ZY, Liu J, et al. Acupuncture modulates emotional network resting-state functional connectivity in patients with insomnia disorder: a randomized controlled trial and fMRI study. BMC Complement Med Ther. Aug 21 2024;24(1):311. doi:10.1186/s12906-024-04612-0

24. Wang XQ, Qin S, Wu WZ, et al. Effect of electroacupuncture on serum melatonin and dopamine in aged insomnia. Journal article. Chinese acupuncture & moxibustion. 2021;41(5):501‐504. doi:10.13703/j.0255-2930.20200404-k0001

25. Xi HQ, Wu WZ, Liu CY, et al. Effect of acupuncture at Tiaoshen acupoints on hyperarousal state in chronic insomnia. Randomized Controlled Trial. Acupuncture Research. 2021-Mar-12 2021;41(3):263-7. doi:10.13703/j.0255-2930.20200303-k0004

26. Yeung WF, Yu BY, Yuen JW, et al. Semi-Individualized Acupuncture for Insomnia Disorder and Oxidative Stress: A Randomized, Double-Blind, Sham-Controlled Trial. Nat Sci Sleep. 2021;13:1195-1207. doi:10.2147/nss.S318874

27. Zhao Y, Wu W, Wang X, Xu Y, Jiang Y, Liu C. To Observe the Effect of Tiaoshen Acupuncture on Hyperarousal in Patients with Chronic Insomnia. Modernization of Traditional Chinese Medicine and Materia Medica-World Science and Technology. 2021;23(07):2538-2543. doi:10.11842/wst.20200704001

28. Huo YS, Chen ZY, Yin XJ, et al. Tiaoshen acupuncture for primary insomnia: a pilot randomized controlled trial. Randomized Controlled Trial; English Abstract;. Chinese acupuncture & moxibustion. 2023-Sep-12 2023;43(9):1008-13. doi:10.13703/j.0255-2930.20221120-0001

29. Zhang L, Deng Y, Hui R, et al. The effects of acupuncture on clinical efficacy and steady-state visual evoked potentials in insomnia patients with emotional disorders: A randomized single-blind sham-controlled trial. Article. Frontiers in Neurology. 2023;13doi:10.3389/fneur.2022.1053642

30. Zhao FY, Zhang ZY, Xia XJ, et al. Memory response to manual acupuncture in chronic insomniacs: evidence from event-related potentials. Journal of Acupuncture and Tuina Science. 2018;16(6):382-388. doi:10.1007/s11726-018-1078-3

31. Wu WZ, Zhao YN, Liu CY, et al. Effects of electroacupuncture on sleep quality, daytime fatigue and serum cortisol in chronic insomnia. Effects of electroacupuncture on sleep quality,daytime fatigue and serum cortisol in chronic insomnia. China Journal of Traditional Chinese Medicine and Pharmacy. 2021;36(9)2021544137.

32. Guo J, Tang CY, Wang LP. Effect of Tiaoshen Acupuncture Therapy on Sleep Quality and Hyperarousal State in Primary Insomnia. Journal of Clinical Acupuncture and Moxibustion. 2017;

33. Song ZX, Jiang TF, Yin XZ, Zhu LY, Guo J. A Study on Central Mechanism of Tiaoshen Acupuncture Treatment for Early Awakening Insomnia Based on fMRI Low-Frequency Amplitude Ratio Analysis. Journal of Clinical Acupuncture and Moxibustion. 2024;doi:10.19917/j.cnki.1005-0779.024147

34. Cui YX, Ao YT, Sun JQ. Metabonomics Study on Acupuncture Improving Primary Insomnia. Clinical Journal of Traditional Chinese Medicine. 2021;33(8)2021512126. doi:10.16448/j.cjtcm.2021.0847

35. Guo J, Hu J, Zhang F, et al. Clinical study of the effect of acupuncture with the method of regulating the spirit on the rate of heart rate variability in primary insomnia. Global Traditional Chinese Medicine. 2019;12(12)2020368089. doi:10.3969/j.issn.1674-1749.2019.12.024

36. Zhang X, Zhang Y, Liu L, Guo J, Zhang F. Acupuncture for regulating hyperarousal state in chronic insomnia with deficiency of heart and spleen:a clinical trial study. Beijing Journal of Traditional Chinese Medicine. 2024;43(7)2024434082. doi:10.16025/j.1674-1307.2024.07.007

37. Zhang LX, Hui R, Tang Y, et al. Effects of acupuncture on insomnia with depression. Effects of acupuncture on insomnia with depression. China Journal of Traditional Chinese Medicine and Pharmacy. 2020;35(8)2020707159.

38. Xu S, Sun Y, Wang S, Wu J, Yin P. Clinical observation on the treatment of primary insomnia mainly by electroacupuncture on Baihui Shenting. Journal of Sichuan of Traditional Chinese Medicine. 2014;32(5)2014516312.

39. Xu X, Wang X, Wu W, et al. Effects of Electroacupuncture on Sleep Quality and Serum Melatonin in Elderly Insomnia Patients. Effects of Electroacupuncture on Sleep Quality and Serum Melatonin in Elderly Insomnia Patients. Shanghai Journal of Acupuncture and Moxibustion. 2022;41(1)2022158412. doi:10.13460/j.issn.1005-0957.2022.01.0001

40. Zhu L, Chen K, Jiang T, Chen Z, Wang G, Guo J. Clinical Study of Spirit-Regulating Acupuncture Improving Sleep Latency and Hyperarousal of Patients with CID. Clinical Study of Spirit-Regulating Acupuncture Improving Sleep Latency and Hyperarousal of Patients with CID. Journal of Clinical Acupuncture and Moxibustion. 2024;40(9)2024488395. doi:10.19917/j.cnki.1005-0779.024167

41. Liu C, Zhao Y, Qin S, Wang X, Jiang Y, Wu W. Randomized controlled trial of acupuncture for anxiety and depression in patients with chronic insomnia. Ann Transl Med. Sep 2021;9(18):1426. doi:10.21037/atm-21-3845

42. Chen Z, Jiang T, Yin X, Li B, Tan Z, Guo J. The increased functional connectivity between the locus coeruleus and supramarginal gyrus in insomnia disorder with acupuncture modulation. Front Neurosci. 2023;17:1131916. doi:10.3389/fnins.2023.1131916

43. Wang YK, Li T, Ha LJ, et al. Effectiveness and cerebral responses of multi-points acupuncture for primary insomnia: a preliminary randomized clinical trial and fMRI study. BMC Complement Med Ther. Aug 17 2020;20(1):254. doi:10.1186/s12906-020-02969-6

44. Higgins JP, Altman DG, Gøtzsche PC, Jüni P, Moher D, Oxman AD, Savovic J, Schulz KF, Weeks L, Sterne JA; Cochrane Bias Methods Group; Cochrane Statistical Methods Group. The Cochrane Collaboration's tool for assessing risk of bias in randomised trials. BMJ. 2011 Oct 18;343:d5928.
